20 **Abstract**

21 Gram-negative bacterial cell envelope is made up of an outer membrane (OM), an inner  
22 membrane (IM) that surrounds the cytoplasm, and a periplasmic space between the two  
23 membranes containing peptidoglycan (PG or murein). PG is an elastic polymer that forms a  
24 mesh-like sacculus around the IM protecting cells from turgor and environmental stress  
25 conditions. In several bacteria including *E. coli*, the OM is tethered to PG by an abundant  
26 OM lipoprotein, Lpp (or Braun lipoprotein) that functions to maintain the structural and  
27 functional integrity of the cell envelope. Since its discovery Lpp has been studied extensively  
28 and although L,D-transpeptidases, the enzymes that catalyse the formation of PG–Lpp  
29 linkages have been earlier identified, it is not known how these linkages are modulated. Here,  
30 using genetic and biochemical approaches, we show that LdtF (formerly *yafK*), a newly-  
31 identified paralog of L,D-transpeptidases in *E. coli* is a murein hydrolytic enzyme that  
32 catalyses cleavage of Lpp from the PG sacculus. LdtF also exhibits glycine-specific  
33 carboxypeptidase activity on muropeptides containing a terminal glycine residue. LdtF is  
34 earlier presumed to be an L,D-transpeptidase; however, our results show that it is indeed an  
35 L,D-endopeptidase that hydrolyses the products generated by the L,D-transpeptidases. To  
36 summarize, this study describes the discovery of a murein endopeptidase with a hitherto  
37 unknown catalytic specificity that removes the PG–Lpp cross-links suggesting a role for LdtF  
38 in regulation of PG-OM linkages to maintain the structural integrity of the bacterial cell  
39 envelope.

40

41

42

43

44 **Significance statement**

45 Bacterial cell walls contain a unique protective exoskeleton, peptidoglycan, which is a target  
46 of several clinically important antimicrobials. In Gram-negative bacteria, peptidoglycan is  
47 covered by an additional lipid layer, outer membrane that serves as permeability barrier  
48 against entry of toxic molecules. In some bacteria, an extremely abundant lipoprotein, Lpp  
49 staples outer membrane to peptidoglycan to maintain the structural integrity of the cell  
50 envelope. In this study, we identify a previously unknown peptidoglycan hydrolytic enzyme  
51 that cleaves Lpp from the peptidoglycan sacculus and show how the outer membrane-  
52 peptidoglycan linkages are modulated in *Escherichia coli*. Overall, this study helps in  
53 understanding the fundamental bacterial cell wall biology and in identification of alternate  
54 drug targets for development of new antimicrobials.

55

56

57

58

59

60

61

62

63

64

## 65 **Introduction**

66 Gram-negative bacterial cell envelope is made up of outer membrane (or OM), an  
67 asymmetric bilayered lipid membrane which is surface-exposed and an inner membrane (or  
68 IM) consisting of a phospholipid bilayer surrounding the cytoplasm. In between these two  
69 membranes is the periplasmic space in which a sac-like molecule, the peptidoglycan (PG or  
70 murein) is located (1). PG is an elastic heteropolymer that protects bacterial cells from lysis  
71 by internal osmotic pressure and from external stress conditions. It is a single, large  
72 macromolecule made up of multiple linear glycan strands that are inter-connected with each  
73 other by short peptide chains forming a net-like sacculus around the cytoplasmic membrane  
74 (Fig.1). The glycan strands are polymers of alternating  $\beta$ -1,4-linked N-acetylglucosamine  
75 (GlcNAc) and N-acetylmuramic acid (MurNAc) disaccharide units in which the D-lactoyl  
76 moiety of each MurNAc residue is covalently attached to the first amino acid of the stem  
77 peptide. Normally, the peptide chains are of two to five amino acids with a pentapeptide  
78 made up of L-alanine (L-ala<sup>1</sup>)–D-glutamic acid (D-glu<sup>2</sup>)–mesodiaminopimelic acid  
79 (mDAP<sup>3</sup>)–D-ala<sup>4</sup>–D-ala<sup>5</sup> residues. In *E. coli*, approximately 40% of the neighbouring peptide  
80 chains are linked to each other, either between the D-ala<sup>4</sup> and mDAP<sup>3</sup> (D-ala–mDAP or 4–3)  
81 or two mDAP<sup>3</sup> residues (mDAP–mDAP or 3–3) residues. Of these, the 4–3 cross-links are  
82 more prevalent and are formed by D,D-transpeptidases whereas 3–3 cross-links are much  
83 less abundant and are catalysed by L,D-transpeptidases (LDTs), LdtD and LdtE (2–4).

84 In several bacteria including *E. coli*, the OM is stapled to PG by a lipoprotein, Lpp or Braun  
85 lipoprotein. Lpp is the first OM lipoprotein to be discovered almost five decades ago and has  
86 been studied extensively (5–9). It is a small abundant protein ( $\sim 10^6$  molecules per cell) of 58  
87 amino acids and is known to exist in two conformations each occupying a distinct subcellular  
88 location in the cell envelope (9–11). One third of total Lpp is in the periplasm covalently

89 attached to the mDAP<sup>3</sup> residues of the PG peptides (bound form) whereas the other two third  
90 spans the OM (free form) (Fig.1). OM-PG tethering by Lpp has been shown to determine the  
91 width of the periplasm by controlling the IM-OM distance and to contribute to the stiffness of  
92 cell envelope (12,13). Although Lpp is not essential for viability of *E. coli*, mutants that lack  
93 Lpp show several pleiotropic defects such as increased sensitivity to hydrophobic agents,  
94 leakage of periplasmic contents, OM blebbing, vesiculation, cell separation defects, as well as  
95 deficiency in virulence, highlighting the role of Lpp in maintenance of envelope integrity  
96 (8,9,14).

97 Three redundant LDTs, LdtA, -B, -C catalyse the formation of PG–Lpp cross-links by  
98 covalently attaching the extreme C-terminal residue of Lpp, lysine to the mDAP<sup>3</sup> residue of a  
99 tetrapeptide in the mature PG sacculus (15). In this reaction, the terminal D-ala residue of the  
100 tetrapeptide is lost leading to the formation of a tripeptide-Lpp cross-link (Fig. 1). About,  
101 10% of the peptides in a PG sacculus are attached to Lpp and this frequency is presumed to  
102 vary during conditions of stress (2,5,16–18).

103 *E. coli* encodes six LDTs, LdtA-F belonging to YkuD family of proteins (3,18,19,20). Of  
104 these, LdtA,-B,-C catalyze the covalent attachment of Lpp to the PG; though these are  
105 redundant, LdtB is physiologically relevant because deleting *ldtB* alone abrogates the  
106 attachment of Lpp to a significant extent (15). Ribosome profiling (10) has also shown the  
107 abundance of LdtB to be much higher (~5,000 copies per cell) than LdtA and LdtC (~50 and  
108 500 respectively). On the other hand, the 3–3 cross-link formation in the PG sacculus is  
109 catalysed by LdtD and LdtE (21).

110 Apart from their ability to form cross-links, LdtA-E catalyse an amino acid exchange reaction  
111 in the periplasm wherein the terminal D-ala<sup>4</sup> residue of the stem peptides is substituted with  
112 either glycine or a variety of noncanonical D-amino acids (NCDAA) such as D-tryptophan,

113 D-methionine or D-aspartate (2,21,22). The significance of this exchange in *E. coli* is not  
114 clear, although, it is believed that these substituted muropeptides do not participate in further  
115 steps of PG polymerization. LDTs are presumed to have a larger role in the maintenance of  
116 structural integrity of PG because of their ability to form cross-links de novo in a mature PG  
117 sacculus independent of active PG precursor synthesis (18).

118 LdtF is a recently-identified paralog of LDTs and is implicated in facilitating the formation of  
119 3–3 cross-links; however, its precise function remains unclear (18–20). Here, we show that  
120 LdtF (encoded by *yafK*) is a murein L,D-endopeptidase that cleaves Lpp from the PG  
121 sacculus. We initially identified *ldtF* because of its genetic interaction with *mepS*, a gene  
122 encoding a major PG elongation-specific D,D-endopeptidase (23). Further genetic and  
123 biochemical analysis demonstrated the role of LdtF in hydrolysing the products generated by  
124 the activity of other LDTs. LdtF cleaves Lpp which is bound to the PG sacculus and in  
125 addition, cleaves the terminal glycine residue that is incorporated into the stem peptides due  
126 to the periplasmic exchange reaction of LDTs. However, LdtF was not able to cleave the  
127 terminal NCDAA residues from the muropeptides. To summarize, this study identifies a  
128 murein endopeptidase with a previously unknown catalytic specificity having an ability to  
129 modulate the Lpp-mediated OM-PG linkages.

## 130 **Results**

### 131 **Lack of PG-Lpp linkages confer growth advantage to an *E. coli* mutant lacking an** 132 **elongation-specific D,D-endopeptidase, *mepS***

133 We showed earlier that absence of 3–3 cross-link forming LDTs (*ldtD* and *ldtE*) confer  
134 growth advantage to a mutant lacking an elongation-specific 4–3 cross-link cleaving D,D-  
135 endopeptidase, MepS signifying the importance of cleavage of both 4–3 and 3–3 cross-links  
136 to make space for incorporation of new PG material during cell elongation (23,24). To

137 examine whether the tethering of OM to PG by Lpp also affects the process of PG expansion,  
138 we introduced a deletion of Lpp into a mutant lacking MepS and examined the growth  
139 phenotypes of the double mutant on Nutrient agar (NA) because *mepS* deletion mutant is  
140 unable to grow on NA (25). Fig. 2A shows that absence of Lpp restores moderate amount of  
141 growth to the *mepS* deletion mutant on NA. In addition, a mutant Lpp allele that lacks the C-  
142 terminal lysine residue and hence unable to bind PG (Lpp<sup>ΔK58</sup>; 11) confers suppression like  
143 that of Lpp deletion. Likewise, deletion of LdtB, which catalyses the formation of  
144 mDAP–Lpp linkages conferred growth to *mepS* deletion mutant (Fig. 2A; Fig. S1, Fig. S2).  
145 However, deletion of LdtA or LdtC which also link Lpp to mDAP did not have any effect on  
146 *mepS* growth (Fig. S1). Surprisingly, deletion of LdtF, the newly-identified paralog of LDTs,  
147 conferred a very small yet consistent growth defect to *mepS* single mutant (Fig. S1) which  
148 was further exacerbated in a *mepS* mutant lacking *mepK*, a gene encoding the 3–3 cross-link  
149 cleaving PG hydrolase (Fig. 2B).

150 As these results intrigued us, we further investigated the role of LdtF by introducing the  
151 plasmids encoding each of the LDTs (26) into the *mepS* mutant. As shown in Fig. S3,  
152 plasmids encoding *ldtA*, *-B*, *-C*, *-D*, *-E* did not confer growth to *mepS* mutant whereas a  
153 plasmid encoding *ldtF* alone was able to moderately suppress the growth defects of *mepS*  
154 mutant. Another plasmid derivative carrying cloned *ldtF* downstream to an IPTG-dependent  
155 promoter ( $P_{trc}::ldtF$ ) also suppressed the growth defects of *mepS* mutant on NA (Fig. 2C)  
156 indicating that LdtF may have a distinct function compared to that of other LDTs. LdtF  
157 belongs to YkuD family of proteins and members of this family contain L,D-transpeptidase  
158 domain with an invariant cysteine residue at the active site (27). To further validate the role  
159 of LdtF, we constructed a mutant derivative with an alanine residue substituted for cysteine  
160 (LdtF-C143A) and examined its ability to suppress the *mepS* mutation. Fig. 2C shows that a  
161 plasmid encoding LdtF-C143A poorly suppressed the *mepS* deletion mutant whereas another

162 variant coding for LdtF-H135A behaved like that of WT. However, deletion of *ldtF* alone in  
163 a WT strain did not confer any discernible phenotype when grown on LB, LBON (LB  
164 without NaCl) or NA plates at 30, 37 or 42°C except a slight reduction in the doubling time  
165 during exponential phase of growth (Fig. S4). In addition, *ldtF* deletion mutant did not  
166 exhibit significant sensitivity to any of the cell wall-antibiotics such as cephalexin,  
167 cefsulodin, mecillinam or vancomycin.

### 168 **LdtF modulates PG–Lpp linkages *in vivo***

169 To understand the basis of LdtF’s function, we examined the composition of PG in strains  
170 either having a deletion or multiple copies of *ldtF*. PG sacculi from these strains were  
171 prepared, digested with a muramidase (mutanolysin) followed by separation of soluble  
172 muropeptides by RP-HPLC and identification of the peaks by MS or MS-MS analysis (as  
173 described in Materials and Methods). No major difference was observed in the muropeptide  
174 profile of *ldtF* deletion derivative compared to that of WT (Fig. S5). In contrast, the PG  
175 sacculi of cells carrying additional copies of *ldtF* had considerable alterations (Fig. 3A; Table  
176 S3), the most significant being absence of peak 3 (tri-lys-arg) which is a disaccharide  
177 tripeptide attached to a lys-arg dipeptide (Fig. 3B, 3C). Tri-lys-arg muropeptides are  
178 generated due to the proteolytic activity of pronase which is used during preparation of PG  
179 sacculi to remove bound Lpp. Pronase cleaves Lpp at the 56<sup>th</sup> position leaving the extreme C-  
180 terminal lys-arg dipeptide attached to the mDAP residue of the stem peptides resulting in  
181 generation of several species of muropeptides bound to lys-arg dipeptide (2). In addition to  
182 absence of peak 3, a muropeptide peak eluting at 46 min (labelled ‘Y’) was significantly  
183 elevated in the PG sacculi of cells carrying additional copies of LdtF (Fig. 3A). MS-MS  
184 analysis indicated this peak to be a tetra-tri dimer linked by 4–3 cross-bridge with a  
185 molecular mass of 1794 Da (Fig. 3B, 3C; Fig. S6). Absence of peak 3 with concomitant



186 increase in peak 1 (a monomer of tri) allowed us to speculate that LdtF may have an ability to  
187 modulate the mDAP–Lpp linkages. Though the source of peak Y is not clear, it was not  
188 detected in a strain deleted for Lpp suggesting it may have originated by the activity of LdtF  
189 on PG–Lpp cross-links (Fig. S7A). Additionally, the incidence of peak Y was not dependent  
190 on the presence of functional LdtD and -E (Fig. S7B). Further, all other alterations observed  
191 due to overexpression of LdtF disappeared in a strain lacking Lpp reinforcing the suggestion  
192 that LdtF functions downstream of Lpp (Fig. S7A). As shown in Fig. 3A, analysis of PG in  
193 strains carrying plasmids encoding either LdtF-C143A or LdtF-H135A indicated a direct role  
194 for LdtF in modulation of mDAP–Lpp linkages (Table S3).

195 Because the above results implicated LdtF in regulation of PG–Lpp linkages, we examined  
196 the extent of these cross-links in cells lacking LdtF. To perform this experiment, Lpp-bound  
197 PG sacculi were prepared from WT and *ldtF* deletion mutant as described in Materials and  
198 Methods. PG sacculi from both strains were digested with mutanolysin, soluble muropeptides  
199 were collected and normalized amounts (Fig. S8) were electrophoresed using SDS-PAGE  
200 followed by western blotting and detection with anti-Lpp antibody. Fig. 3D shows that the  
201 PG sacculi derived from LdtF deletion mutant indeed contain a greater abundance of high  
202 molecular weight Lpp-bound muropeptides compared to that of WT, although the level of  
203 low-molecular weight Lpp-bound muropeptides were unchanged. This observation suggested  
204 an interesting possibility of LdtF specifically moderating the larger oligomeric Lpp–cross-  
205 linked muropeptides of the PG sacculus and the implications of this result are further  
206 discussed below.

### 207 **LdtF is a murein endopeptidase that cleaves PG–Lpp linkages**

208 To examine the enzymatic activity of LdtF, a signal-less hexa-histidine tagged LdtF (LdtF<sup>20-</sup>  
209 <sup>246</sup>-His<sub>6</sub>) was overexpressed and purified as described in Materials and Methods. Treatment

210 of soluble muropeptides derived from the PG sacculi of WT *E. coli* with purified LdtF  
211 yielded muropeptide fraction that totally lacked tri-lys-arg (peak 3) and tetra-tri-lys-arg (peak  
212 6) with concomitant increase in tri- and tetra-tri muropeptides (Fig. 4A). Cleavage of tri-lys-  
213 arg and tetra-tri-lys-arg into tri- or tetra-tri muropeptides was also confirmed using purified  
214 fractions (Fig. 4B, 4C, 4D).

215 We next examined the ability of LdtF to cleave the bound Lpp from the intact PG sacculi. To  
216 perform this experiment, Lpp-bound PG sacculi from WT and *ldtF* mutant were isolated and  
217 equal amounts of each were treated with purified LdtF. The soluble fraction was  
218 electrophoresed on SDS-PAGE and Lpp was detected by western analysis using anti-Lpp  
219 antibody. As a positive control, PG sacculi treated with pronase were used. Fig. 4E shows  
220 that both LdtF and pronase cleave Lpp from the PG sacculi and that the amount of Lpp  
221 released from the sacculi of LdtF deletion mutant was considerably higher (approximately 5-  
222 fold) than that of the WT (compare lanes 2 and 3 with 5 and 6). The remaining insoluble PG  
223 fraction was further analysed by RP-HPLC and as expected, the lys-arg muropeptides were  
224 not detected in LdtF-treated PG whereas pronase-treated PG contained the lys-arg  
225 muropeptides (Fig. S9). Overall, these results demonstrate the catalytic specificity of LdtF on  
226 PG-Lpp or PG-lys-arg substrates.

227 **LdtF is a glycine-specific carboxypeptidase that cleaves terminal glycine residue from**  
228 **the stem peptides**

229 The above experiments clearly demonstrated hydrolytic activity of LdtF on PG-Lpp linkages  
230 formed by LdtA, -B and -C. LDTs also exchange the terminal D-ala of stem peptides with a  
231 glycine residue. To examine whether LdtF has any activity on glycine-substituted  
232 muropeptides, soluble muropeptides of a WT strain grown with glycine-supplementation  
233 were used as substrates for LdtF. As expected, growth of WT *E. coli* with exogenously added

234 glycine resulted in accumulation of a large number of muropeptides with glycine at position 4  
235 whose identity is determined by MS or MS-MS analysis (Fig. S10). Fig. 5A shows that LdtF  
236 effectively removes glycine from a variety of glycine-containing muropeptides. LdtF also  
237 cleaved several glycine-containing muropeptides prepared from PG sacculi of a strain  
238 overexpressing LdtD (Fig. 5B). Of these, three distinct types of glycine-containing  
239 muropeptides were purified to homogeneity and Fig. 5C, 5D, 5E show that LdtF removes  
240 glycine residue from all these muropeptides. However, the abundance of glycine-containing  
241 muropeptides remained the same in both WT and *ldtF* deletion mutant when grown with  
242 glycine-supplementation suggesting the existence of alternate carboxypeptidases that cleave  
243 the terminal glycine residue. In support of this idea, *ldtF* deletion mutant was not sensitive to  
244 addition of glycine and behaved just like that of WT strain.

245 Considering an earlier report that D,D-carboxypeptidases hydrolyse the terminal glycine from  
246 the stem peptides (2,28), we made a quadruple mutant deleted for major D,D-  
247 carboxypeptidases, DacA, -B, -C, -D and tested for sensitivity to glycine. As expected, the  
248 quadruple mutant formed smaller-sized colonies on glycine-supplemented media (Fig. S11).  
249 Introduction of *ldtF* deletion marginally exacerbated the defect of this quadruple mutant  
250 whereas multiple copies of *ldtF* moderately improved the growth of this mutant on glycine-  
251 containing media (Fig. S11) implicating a role for LdtF in removal of terminal glycine  
252 residue from the stem peptides. In sum, the above results demonstrate that LdtF is a glycine-  
253 specific carboxypeptidase.

#### 254 **LdtF does not cleave NCDAAs from the stem peptides**

255 To examine whether LdtF also cleaves the terminal NCDAAs residues that are substituted by  
256 the exchange reaction of the LDTs, PG sacculi were made from WT *E. coli* grown in the  
257 presence of D-methionine, D-tryptophan or D-phenylalanine (22). Soluble muropeptides of

258 these PG sacculi were separated and the peaks containing the NCDAAs were  
259 identified by MS analysis (Fig. S12A) and used as substrates for LdtF (Fig. S12B). However,  
260 LdtF was not able to cleave the terminal NCDAAs from any of these muropeptides (Fig.  
261 S12B).

## 262 **LdtF removes Lpp-mediated IM-PG linkages**

263 Lpp is transported from the cytosol into the periplasm by Sec-mediated pathway and is  
264 eventually translocated to the OM by lipoprotein translocating machinery, LolABCDE (29).  
265 However, in certain transport-defective mutants, Lpp is stalled at the periplasmic face of the  
266 IM leading to the formation of IM-PG linkages by LDTs (30,31). It has been shown recently  
267 that absence of two small cytoplasmic membrane proteins, DcrB and YciB leads to  
268 mislocalization of Lpp at the IM, resulting in lethal IM-PG cross-links, and that this lethality  
269 is suppressed by deletion of either Lpp or LdtB (31). To examine the ability of LdtF to cleave  
270 the Lpp bound to IM, we made use of this mutant and observed that a deletion of *ldtF*  
271 exacerbates the growth defect of *yciB dcrB* double mutant (Fig. 6A). In addition, introduction  
272 of a multicopy *ldtF* plasmid ( $P_{trc}::ldtF$ ) partially restored the growth of the *yciB dcrB* double  
273 mutant, suggesting that LdtF may also cleave Lpp bound to the IM (Fig. 6B).

## 274 **Discussion**

275 Here, we report identification of a previously unknown peptidoglycan hydrolase, LdtF that  
276 cleaves Lpp (or Braun lipoprotein), an abundant OM lipoprotein which links OM to the PG  
277 sacculus in *E. coli*. LdtF is also a glycine-specific carboxypeptidase that removes the terminal  
278 glycine residue from the PG muropeptides. LdtF is a recently-identified member of YkuD  
279 family of proteins in *E. coli*; the other paralogs of this family comprise LdtA, -B, -C that  
280 catalyse the formation of mDAP–Lpp linkages and LdtD and -E which catalyse the formation

281 of mDAP–mDAP cross-links. This study also represents an instance wherein members of a  
282 paralogous family perform contrasting but not overlapping functions.

### 283 **Role of LdtF in maintenance of envelope structure and stability**

284 We identified LdtF in this study because its absence enhanced growth defects of a mutant  
285 lacking two of the PG elongation-specific endopeptidases, MepS and MepK and additionally,  
286 multiple copies of *ldtF* rescued the defects of *mepS* mutant (Fig. 2B, 2C). Moreover, we  
287 observed that absence of LdtF increases the PG–Lpp linkages (Fig. 3D) whereas more copies  
288 of *ldtF* decrease the level of PG-bound Lpp (Fig. 3A), suggesting a role for LdtF in  
289 modulating the degree of PG–Lpp cross-linkages. Subsequent biochemical analysis  
290 confirmed LdtF to be a hydrolase having two distinctive enzymatic functions- an L,D-  
291 endopeptidase activity that cleaves mDAP–Lpp cross-links and a carboxypeptidase activity  
292 that cleaves mDAP–gly linkages (Fig. 4; Fig. 5).

293 LdtF was earlier identified because a transposon insertion in *ldtF* (*yafK*) caused defective  
294 biofilm formation in an enteroaggregative *E. coli* strain (32). LdtF deletion has also been  
295 shown to confer additive sickness to a mutant defective in the transport of lipopolysaccharide  
296 (18). Although the basis of the above phenotypes is not clear, elevated OM-PG linkages may  
297 result in a defective cell envelope leading to such phenotypes. Excess OM-PG linkages may  
298 also alter the plasticity of the cell wall resulting in decreased fitness and survival of *E. coli*.  
299 Nevertheless, under laboratory conditions, absence of *ldtF* did not result in a large effect on  
300 the growth of *E. coli* excepting a small decrease in the doubling time (Fig. S4).

301 It is interesting to note that although the abundance of lower molecular weight Lpp-bound  
302 muropeptides was comparable in both WT and *ldtF* mutant (Fig. 3D, Fig. S5), the amount of  
303 bound Lpp is considerably higher in absence of LdtF (Fig. 3D, 4E). Occurrence of larger  
304 Lpp-bound oligomeric muropeptides in *ldtF* mutant (Fig. 3D) strongly suggests that LdtF

305 may preferentially cleave PG–Lpp cross-links of higher order structures in the PG sacculus.  
306 Lpp-mediated OM-PG cross-linkages resulting in formation of large oligomers may distort  
307 the symmetry, or the organization of cell envelope and LdtF may perhaps work towards  
308 eliminating such linkages. In addition, the effect of *ldtF* alleles on the growth of mutants in  
309 which Lpp is stalled at the IM (Fig. 6) suggests a role for LdtF in removal of rare IM-PG  
310 linkages that may occur during transport of Lpp across the periplasm. LdtF may also facilitate  
311 PG turnover as the Lpp-linked muropeptides may not efficiently get recycled unless Lpp is  
312 cleaved from the PG sacculi.

313 Earlier studies implicated LdtF in facilitating the formation of 3–3 cross-links because  
314 ectopic expression of LdtF along with coexpression of LdtD or -E (in a strain  
315 lacking *ldtABCDEF*) increased the level of 3–3 cross-links (18–20). However, we did not  
316 observe increased 3–3 dimers when LdtF is overexpressed in WT; in contrast, we detected  
317 increased 4–3 linked dimer (peak Y) whose occurrence was dependent on Lpp but not on  
318 LdtD or-E (Fig. S7). The basis of this discrepancy is not clear – it may perhaps be due to the  
319 strain background used for these studies and needs to be further investigated.

### 320 **Regulation of PG–Lpp linkages**

321 Lpp is an abundant OM lipoprotein (5,6,10) with one third of it covalently attached to PG,  
322 making almost 10% of the peptides linked to Lpp. However, it is not clear how *E. coli*  
323 maintains optimal levels of PG–Lpp linkages. The combined activities of LdtABC and LdtF  
324 may control the abundance of PG–Lpp linkages or alternatively structural/ conformational  
325 constraints of PG sacculi may limit the extent of PG–Lpp cross-link formation. These  
326 linkages are reported to be higher during conditions of stress including stationary-phase of  
327 growth and certain mutant conditions (2,16–18). LdtF promoter expression is shown to be  
328 higher in stationary-phase (18); however, preliminary experiments done in our laboratory to

329 examine the endogenous LdtF expression (using a LdtF-FLAG fusion) show that the protein  
330 levels fall during stationary-phase suggesting a likely basis for the occurrence of higher  
331 amount of PG–Lpp linkages in stationary phase. It would be worthwhile to further examine  
332 how cells achieve a dynamic yet balanced level of PG-Lpp linkages to maintain the structural  
333 and functional integrity of the cell envelope.

### 334 **Role of PG–Lpp linkages in PG enlargement**

335 Absence of PG–Lpp linkages either by deleting Lpp, LdtB or increasing the copy number of  
336 LdtF, partially rescued the growth defects of a *mepS* deletion mutant (Fig. 2A, 2C); however,  
337 the suppression was not very robust (Fig. S1, S2). In addition, other phenotypes of *mepS* such  
338 as sensitivity to  $\beta$ -lactam antibiotic, mecillinam or its synthetic lethality with deletion of  
339 *mepM* (23) were not suppressed by deletion of Lpp or LdtB suggesting that the absence of  
340 Lpp linkages may not significantly affect the process of PG enlargement. Lack of OM-PG  
341 tethering may perhaps alter the mechanical properties of the cell envelope and increase the  
342 flexibility of the PG sacculus, consequently resulting in a marginal growth advantage to *mepS*  
343 mutants in low osmolar conditions such as NA.

### 344 **Materials and Methods**

345 **Media, bacterial strains and plasmids.** LB has 0.5% yeast extract, 1% tryptone and 1%  
346 NaCl (33). LBON is LB without NaCl. NA (Nutrient Agar) has 0.5% peptone and 0.3% beef  
347 extract. Antibiotics were used at the following concentrations ( $\mu\text{g}/\text{mL}$ ): ampicillin (Amp)-50,  
348 chloramphenicol (Cm)-30, and kanamycin (Kan)-50. Bacterial strains and plasmids used in  
349 this study are listed in Tables S1-S2 (SI).

350 **Molecular and genetic techniques.** Recombinant DNA and plasmid constructions were  
351 performed as per standard methods. MG1655 genomic DNA was used as template and

352 Phusion HF DNA polymerase was used for PCR amplifications and the plasmid clones were  
353 confirmed by sequence analysis. P1-phage mediated transductions and transformations were  
354 performed using standard methods (33). All strains are derivatives of MG1655 (Coli Genetic  
355 Stock Centre). Deletion mutations are from Keio mutant collection (34).

### 356 **Determination of PG–Lpp linkages in the PG sacculi**

357 Lpp-bound PG sacculi were isolated from cultures of WT and  $\Delta ldtF$  mutant, treated with  
358 mutanolysin and the soluble fraction was run on 15% SDS-PAGE followed by western  
359 blotting using anti-Lpp antibody.

### 360 **Determination of enzymatic activity**

361 To examine the activity of LdtF, soluble muropeptides were incubated with either buffer or  
362 LdtF (4  $\mu$ M) at 30°C for 16 h. Samples were heat inactivated, reduced with sodium  
363 borohydride and separated by RP-HPLC. Lpp cleavage was examined by incubating purified  
364 LdtF (4  $\mu$ M) with the Lpp-bound PG sacculi for 16 h in 25 mM Tris-HCl (pH 8.0) at 30°C  
365 followed by electrophoresis of the soluble fraction on SDS-PAGE and western blotting with  
366 anti-Lpp antibody.

### 367 **Supplemental Information**

368 Details of strains, plasmids, additional materials and methods are described in Supplementary  
369 Information (SI). Tables S1-S3 and Figures S1-S12 are included in SI.

### 370 **Acknowledgements**

371 We thank NBRP: *E. coli* for Keio collection and ASKA plasmid library; Thomas Silhavy for  
372 Lpp-K58 allele and anti-Lpp antibody; Sujata Kumari for initiating the work; V Krishna  
373 Kumari and C Subbalakshmi for HPLC; B Raman and Y Kameshwari for mass spectrometry



374 analysis; N Madhusudhana Rao for suggestions, and members of Reddy laboratory for  
375 critical comments. This work is supported by funds from Council of Scientific and Industrial  
376 Research (MLP0141) and Department of Biotechnology (Centre of Excellence in Microbial  
377 Biology), Govt of India (to MR). We acknowledge financial support from Department of  
378 Biotechnology (to RB) and University Grants Commission of India (to PKC).

### 379 **Author Contributions**

380 RB and MR designed the study; RB and PKC performed the experiments; RB, PKC and MR  
381 analysed the data and wrote the manuscript.

382

383 **References**

- 384 1. T. J. Silhavy, D. Kahne, S. Walker, The bacterial cell envelope. *Cold Spring Harb*  
385 *Perspect Biol* 2:a000414 (2010).
- 386 2. B. Glauner, J. V. Höltje, U. Schwarz, The composition of the murein of *Escherichia*  
387 *coli*. *J. Biol. Chem.* **263**, 10088-10095 (1988).
- 388 3. A. J. F. Egan, J. Errington, W. Vollmer, Regulation of peptidoglycan synthesis and  
389 remodelling. *Nat. Rev. Microbiol.* **18**, 446-460 (2020).
- 390 4. S. Garde, P. K. Chodisetti, M. Reddy, Peptidoglycan: Structure, Synthesis and  
391 Regulation. *EcoSal Plus*. ESP-0010-2020 (2021).
- 392 5. V. Braun, K. Rehn, Chemical characterization, spatial distribution and function of a  
393 lipoprotein (murein-lipoprotein) of the *E. coli* cell wall. The specific effect of trypsin  
394 on the membrane structure. *Eur. J. Biochem.* **10**, 426-438 (1969).
- 395 6. V. Braun, V. Bosch, Sequence of the murein-lipoprotein and the attachment site of the  
396 lipid. *Eur. J. Biochem.* **28**, 51-69 (1972).
- 397 7. M. Inouye, L. Shaw, C. Shen, The assembly of a structural lipoprotein in the envelope  
398 of *Escherichia coli*. *J. Biol. Chem.* **247**, 8154-8159 (1972).
- 399 8. V. Braun, K. Hantke, Lipoproteins: Structure, Function, Biosynthesis. *Subcell.*  
400 *Biochem.* **92**, 39-77 (2019).
- 401 9. A. T. Asmar, J. F. Collet, Lpp, the Braun lipoprotein, turns 50-major achievements  
402 and remaining issues. *FEMS Microbiol. Lett.* **365** (2018).
- 403 10. G. W. Li, D. Burkhardt, C. Gross, J. S. Weissman, Quantifying absolute protein  
404 synthesis rates reveals principles underlying allocation of cellular resources. *Cell.*  
405 **157**, 624-635 (2014).

- 406 11. C. E. Cowles, Y. Li, M. F. Semmelhack, I. M. Cristea, T. J. Silhavy, The free and  
407 bound forms of Lpp occupy distinct subcellular locations in *Escherichia coli*. *Mol.*  
408 *Microbiol.* **79**, 1168-1181 (2011).
- 409 12. A. T. Asmar, *et al.*, Communication across the bacterial cell envelope depends on the  
410 size of the periplasm. *PLoS Biol.* **15**, e2004303 (2017).
- 411 13. M. Mathelié-Guinlet, A. T. Asmar, J. F. Collet, Y. F. Dufrêne, Lipoprotein Lpp  
412 regulates the mechanical properties of the *E. coli* cell envelope. *Nat. Commun.* **11**,  
413 1789 (2020).
- 414 14. A. N. Sanders, M. S. Pavelka, Phenotypic analysis of *Escherichia coli* mutants  
415 lacking L,D-transpeptidases. *Microbiology.* **159**, 1842-1852 (2013).
- 416 15. S. Magnet *et al.*, Identification of the L,D-transpeptidases responsible for attachment  
417 of the Braun lipoprotein to *Escherichia coli* peptidoglycan. *J. Bacteriol.* **189**, 3927-  
418 3931 (2007).
- 419 16. G. A. Pisabarro, M. A. de Pedro, D. Vázquez, Structural modifications in the  
420 peptidoglycan of *Escherichia coli* associated with changes in the state of growth of  
421 the culture. *J. Bacteriol.* **161**, 238-242 (1985).
- 422 17. C. Schwechheimer, D. L. Rodrigue, M. J. Kuehn, NlpI-mediated modulation of outer  
423 membrane vesicle production through peptidoglycan dynamics in *Escherichia coli*.  
424 *Microbiology* **4**, 375-389 (2015).
- 425 18. N. Morè, *et al.*, Peptidoglycan remodeling enables *Escherichia coli* to survive severe  
426 outer membrane assembly defect. *mBio.* **10**, e02729 (2019).
- 427 19. A. Montón Silva, *et al.*, The fluorescent D-amino acid NADA as a tool to study the  
428 conditional activity of transpeptidases in *Escherichia coli*. *Front. Microbiol.* **9**, 2101  
429 (2018).

- 430 20. K. Peters, *et al.*, Copper inhibits peptidoglycan LD-transpeptidases suppressing  $\beta$ -  
431 lactam resistance due to bypass of penicillin-binding proteins. *Proc. Natl. Acad. Sci.*  
432 *U.S.A.* **115**, 10786-10791 (2018).
- 433 21. S. Magnet, L. Dubost, A. Marie, M. Arthur, L. Gutmann, Identification of the L,D-  
434 transpeptidases for peptidoglycan cross-linking in *Escherichia coli*. *J. Bacteriol.* **190**,  
435 4782-4785 (2008).
- 436 22. M. Caparrós, A. G. Pisabarro, M. A. de Pedro, Effect of D-amino acids on structure  
437 and synthesis of peptidoglycan in *Escherichia coli*. *J. Bacteriol.* **174**, 5549-5559  
438 (1992).
- 439 23. S. K. Singh, L. SaiSree, R. N. Amrutha, M. Reddy, Three redundant murein  
440 endopeptidases catalyse an essential cleavage step in peptidoglycan synthesis of  
441 *Escherichia coli* K12. *Mol. Microbiol.* **86**, 1036-1051 (2012).
- 442 24. P. K. Chodiseti, M. Reddy, Peptidoglycan hydrolase of an unusual cross-link  
443 cleavage specificity contributes to bacterial cell wall synthesis. *Proc. Natl. Acad. Sci.*  
444 *U.S.A.* **116**, 7825-7830 (2019).
- 445 25. H. Hara, N. Abe, M. Nakakouji, Y. Nishimura, K. Horiuchi, Overproduction of  
446 penicillin-binding protein 7 suppresses thermosensitive growth defect at low  
447 osmolarity due to an *spr* mutation of *Escherichia coli*. *Microb. Drug. Resist.* **2**, 63-72  
448 (1996).
- 449 26. M. Kitagawa, *et al.*, Complete set of ORF clones of *Escherichia coli* ASKA library (a  
450 complete set of *E. coli* K-12 ORF archive): unique resources for biological research.  
451 *DNA Res.* **12**, 291-299 (2005).
- 452 27. S. Biarrotte-Sorin *et al.*, Crystal structure of a novel beta-lactam-insensitive  
453 peptidoglycan transpeptidase. *J. Mol. Biol.* **359**, 533-538 (2006).

- 454 28. T. Miyamoto, M. Katane, Y. Saitoh, M. Sekine, H. Homma, Involvement of  
455 penicillin-binding proteins in the metabolism of a bacterial peptidoglycan containing a  
456 non-canonical D-amino acid. *Amino Acids*. **52**, 487-497 (2020).
- 457 29. J. Szewczyk, J. F. Collet, The journey of lipoproteins through the cell: one birthplace,  
458 multiple destinations. *Adv. Microb. Physiol.* **69**, 1-50 (2016).
- 459 30. T. Yakushi, T. Tajima, S. Matsuyama, H. Tokuda, Lethality of the covalent linkage  
460 between mislocalized major outer membrane lipoprotein and the peptidoglycan of  
461 *Escherichia coli*. *J. Bacteriol.* **179**, 2857-2862 (1997).
- 462 31. A. Mychack, *et al.*, A synergistic role for two predicted inner membrane proteins of  
463 *Escherichia coli* in cell envelope integrity. *Mol. Microbiol.* **111**, 317-337 (2019).
- 464 32. J. Sheikh, S. Hicks, M. Dall'Agnol, A. D. Phillips, J. P. Nataro, Roles for Fis and  
465 YafK in biofilm formation by enteroaggregative *Escherichia coli*. *Mol. Microbiol.* **41**,  
466 983-997 (2001).
- 467 33. J. H. Miller, A Short Course in Bacterial Genetics: A Laboratory Manual and  
468 Handbook for *Escherichia coli* and Related Bacteria (Cold Spring Harbor Lab Press,  
469 Cold Spring Harbor, NY) (1992).
- 470 34. T. Baba, *et al.*, Construction of *Escherichia coli* K-12 in-frame, single-gene knockout  
471 mutants: the Keio collection. *Mol. Syst. Biol.* **2**:2006.0008 (2006).
- 472 35. K. A. Datsenko, B. L. Wanner, One-step inactivation of chromosomal genes in  
473 *Escherichia coli* K-12 using PCR products. *Proc. Natl. Acad. Sci. U.S.A.* **97**, 6640–  
474 6645 (2000).
- 475 36. S. Uzzau, N. Figueroa-Bossi, S. Rubino, L. Bossi, Epitope tagging of chromosomal  
476 genes in *Salmonella*. *Proc. Natl. Acad. Sci. U.S.A.* **98**, 15264-15269 (2001).

477

478

479 **Figures:**

Fig. 1

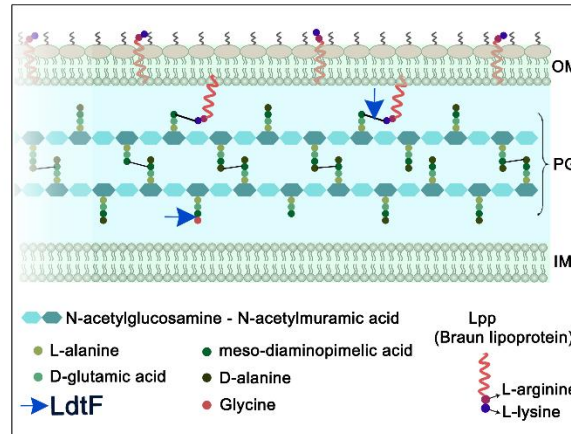

480

481 **Fig. 1.** Diagrammatic representation of the cell envelope of *E. coli*. Cell envelope consists of  
482 three layers- outer membrane (OM), peptidoglycan (PG) and inner membrane (IM). PG is  
483 stapled to the OM by Lpp or Braun lipoprotein (red helix) which exists in bound or free form  
484 (5–9). In the bound form, the N-terminal end of Lpp is anchored to the OM whereas the C-  
485 terminal lysine (purple circle) is covalently attached to an mDAP residue (dark green) of the  
486 PG stem peptides. The free form of Lpp spans the OM and is exposed to the surface (11).  
487 LdtF is identified in this study as an endopeptidase which cleaves PG–Lpp cross-links and  
488 also as a glycine-specific carboxypeptidase.

489

Fig. 2

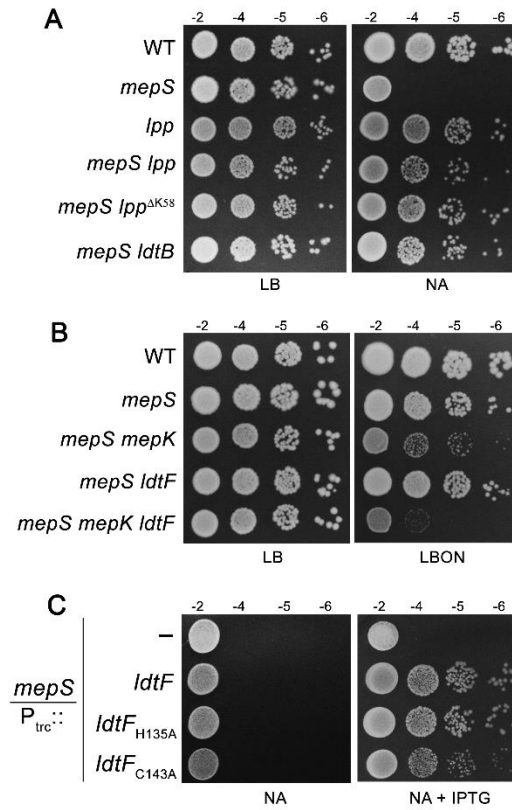

490

491 **Fig. 2.** Genetic interactions of *mepS* with LDTs. (A) WT and its mutant derivatives carrying  
 492 either deletion of *lpp*, *ldtB* or *lpp<sup>ΔK58</sup>*, an allele lacking C-terminal lysine were tested for  
 493 viability at 37°C. (B) Indicated strains were grown and viability was tested as described  
 494 above. (C) A *mepS* deletion mutant carrying either vector (pTrc99a; P<sub>trc</sub>::) or pRB1  
 495 (P<sub>trc</sub>::*ldtF*) or pRB2 (P<sub>trc</sub>::*ldtF<sub>H135A</sub>*) or pRB3 (P<sub>trc</sub>::*ldtF<sub>C143A</sub>*) were grown in LB broth  
 496 supplemented with ampicillin and growth was examined on nutrient agar (NA) plates with or  
 497 without IPTG (0.25 mM) at 37°C.

498

Fig. 3

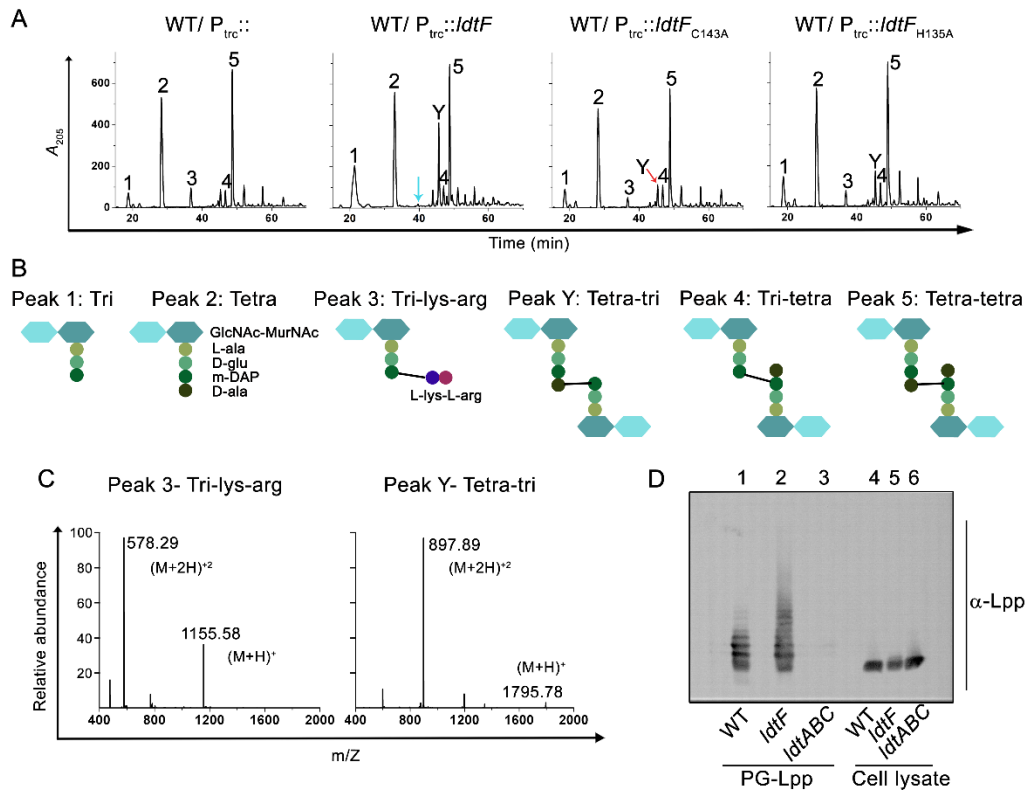

499

500 **Fig. 3.** LdtF modulates PG-Lpp linkages. (A) HPLC chromatograms of PG sacculi of WT

501 carrying either vector ( $P_{trc}::$ ), pRB1( $P_{trc}::ldtF$ ), pRB2 ( $P_{trc}::ldtF_{H135A}$ ) or pRB3

502 ( $P_{trc}::ldtF_{C143A}$ ). Cultures were grown to an  $A_{600}$  of  $\sim 1$  in LB containing 0.2 mM IPTG

503 followed by isolation and analysis of PG sacculi. (B) Structures of mucopeptides (C) Mass

504 spectra of peaks 3 and Y showing molecular mass  $(M+H)^+$  of 1,155.58 Da and 1795.78 Da

505 (D) Determination of PG-Lpp linkages in WT, *ldtF* mutant was done by treating intact PG

506 sacculi (with bound Lpp) with mutanolysin followed by electrophoresing the soluble

507 mucopeptides. Lpp containing mucopeptides were visualized by western blot using anti-Lpp

508 antibody. PG from *ldtABC* mutant was used as negative control. Cell lysates of WT, *ldtF* and

509 *ldtABC* were used as controls (lanes 4, 5 and 6).



510

Fig. 4

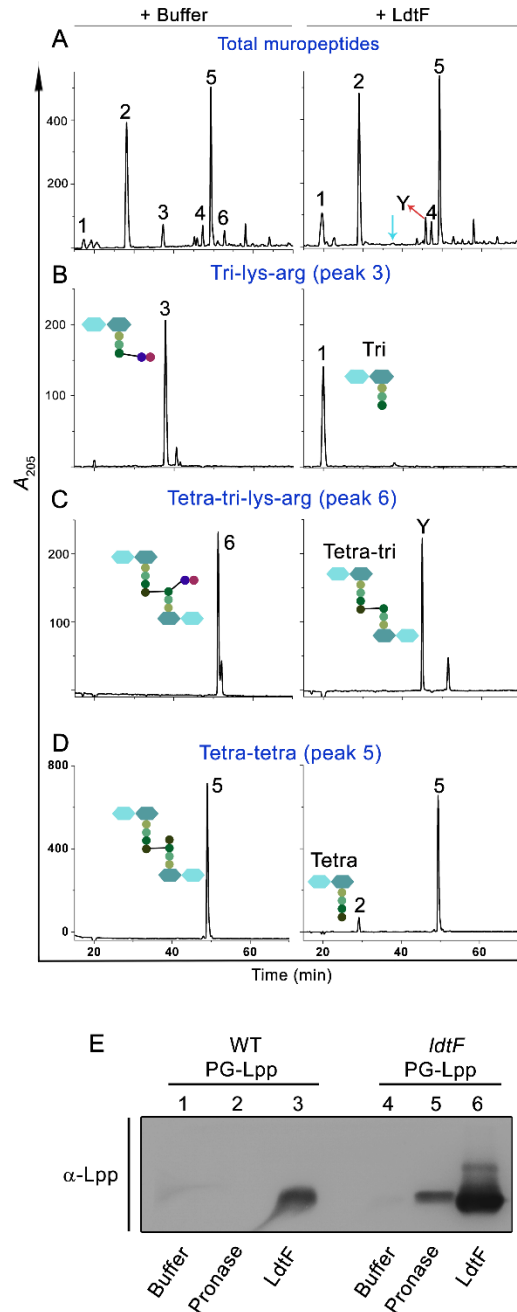

511

512 **Fig. 4.** Endopeptidase activity of LdtF. (A) Soluble mucopeptides of WT PG sacculi, (B)  
 513 purified tri-lys-arg, (C) purified tetra-tri-lys-arg, or (D) purified tetra-tetra dimer were  
 514 incubated either with buffer or LdtF (4  $\mu$ M) for 16 h and separated by RP-HPLC. LdtF  
 515 cleaved peak 3 (tri-lys-arg) to yield tri (peak 1); and peak 6 (tetra-tri-lys-arg) to yield tetra-tri

516 (peak Y). LdtF showed an extremely weak activity on tetra-tetra dimer (peak 5) (E) Cleavage  
517 of Lpp protein from the PG sacculi (containing bound Lpp) of WT, *ldtF* mutant was tested by  
518 incubating the PG sacculi either with buffer, pronase (0.2 mg/ml) or LdtF (4  $\mu$ M) for 16 h at  
519 30°C. Pronase, a non-specific protease is used as a positive control.

520

Fig. 5

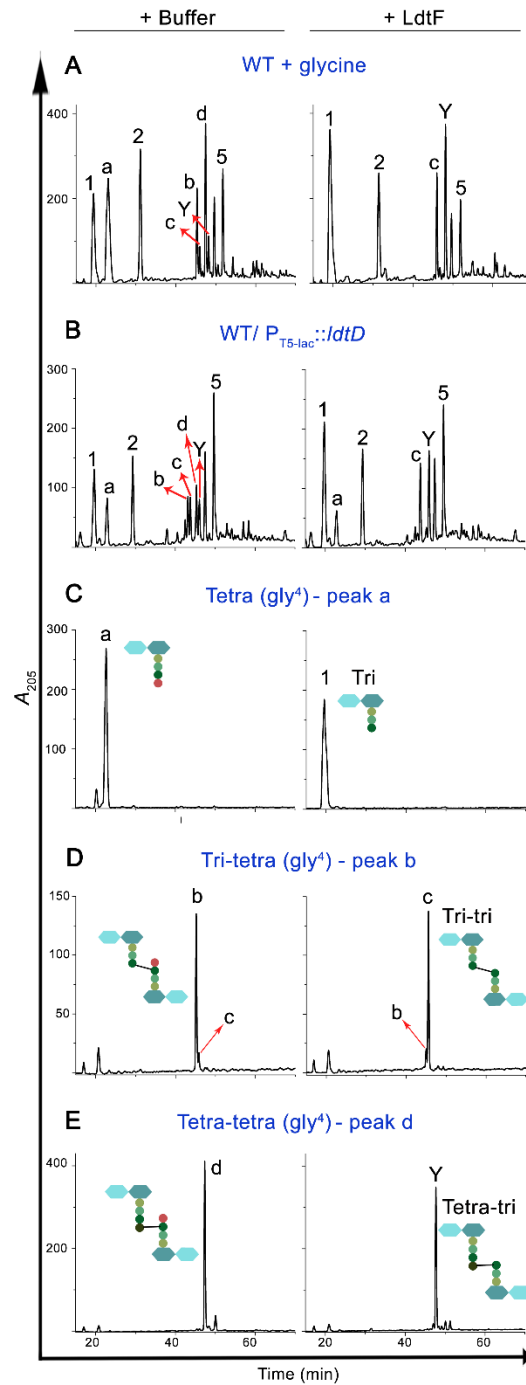

521

522 **Fig. 5.** LdtF is a glycine-specific carboxypeptidase. (A) Soluble muropeptides generated from  
523 WT cells grown in minimal A medium (33) supplemented with 50 mM glycine, (B) soluble  
524 muropeptides of WT/  $P_{T5-lac}::ldtD$ , (C) purified tetra (gly<sup>4</sup>), (D) tri-tetra (gly<sup>4</sup>), or (E) tetra-  
525 tetra (gly<sup>4</sup>) were incubated either with buffer or LdtF (4  $\mu$ M) and processed as described

526 above. LdtF cleaved the terminal glycine residue completely from peak ‘a’ (tetra-gly<sup>4</sup>), ‘b’  
527 (tri-tetra-gly<sup>4</sup>) or ‘d’ (tetra-tetra-gly<sup>4</sup>) to yield peak 1 (tri), ‘c’ (tri-tri) or Y (tetra-tri)  
528 respectively. All the muropeptides were analysed by mass spectrometry (Fig. S10).

529

Fig. 6

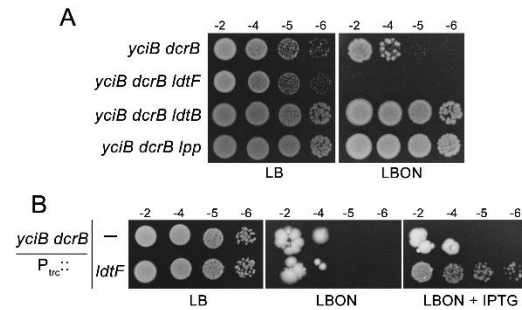

530

531 **Fig. 6.** LdtF may also cleave Lpp-mediated IM-PG linkages. (A) *yciB dcrB* mutant and its

532 *ldtF*, *ldtB* or *lpp* deletion derivatives were grown overnight in LB broth, serially diluted, and

533 5  $\mu$ L of each dilution were spotted on indicated plates and tested for viability at 30°C. (B)

534 Viability of *yciB dcrB* mutant carrying either vector ( $P_{trc}::$ ) or pRB1 ( $P_{trc}::ldtF$ ) was tested as

535 described above at 37°C. IPTG was used at 0.1 mM.

536

537 **Supplemental Information:**

538

539

540

541

542

543 **Cleavage of Braun lipoprotein Lpp from the bacterial peptidoglycan by a paralog of**

544 **L,D-transpeptidases, LdtF**

545

546

547

548 Raj Bahadur, Pavan Kumar Chodiseti, and Manjula Reddy\*

549 CSIR-Centre for Cellular and Molecular Biology

550 Hyderabad India 500007

551

552

553

554

555

556

## 557 **Supporting Materials and Methods**

### 558 **Plasmid constructions**

559 For PCR amplifications, genomic DNA of MG1655 strain was used as a template unless  
560 otherwise indicated. Amplification of DNA for cloning purposes was done using Phusion  
561 DNA polymerase (NEB) and clones obtained were confirmed by sequence analysis.

562 **pRB1.** The *ldtF* gene along with its native ribosome binding site (RBS) was PCR amplified  
563 using forward and reverse primers 5'-GCTCTAGAAAGGAATAAGCAGTATGCGTAAA-3'  
564 and 5'-CCCAAGCTTTTATTTTGCCTCGGGGAGCGTGT-3' respectively and the resulting  
565 amplified DNA fragment was cloned using XbaI and HindIII sites (underlined in the primer  
566 sequence) in a cloning vector, pTrc99a to obtain pRB1. The clones were confirmed by  
567 sequence analysis and shown to suppress the NA-sensitivity of  $\Delta mepS$  mutant at 37°C with  
568 250  $\mu$ M IPTG.

569 **pRB2 and pRB3.** To create site directed variants of *ldtF* (H135A and C143A), a 3 step PCR  
570 was performed. For this procedure, two primers were synthesized that are complementary to  
571 each other with desired mutations at the center (in bold and underlined). In the first PCR step,  
572 N-terminal fragment of *ldtF* gene was amplified using a common forward primer and a  
573 reverse primer containing the desired mismatch. In the second PCR step, C-terminal fragment  
574 of *ldtF* gene was amplified using a forward primer containing the desired mismatch and a  
575 common reverse primer. Desired mismatches code for an alanine instead of H135, and C143  
576 in the LdtF. Common forward primer (containing its native RBS and an XbaI site), and  
577 reverse primer (containing a HindIII site) are used for cloning these variants.

578 Common forward primer: 5'-GCTCTAGAAAGGAATAAGCAGTATGCGTAAA-3' and

579 Reverse primer: 5'-CCCAAGCTTTTATTTTGCCTCGGGGAGCGTGT-3'.

580 The forward and reverse primers with nucleotide substitution are:

581 Histidine to alanine change at codon 135-

582 5'-AAGGGAAATACCTGATGATCGCTGGCGATTGTGTTTCCATCGG-3' and

583 5'-CCGATGGAAACACAATCGCCAGCGATCATCAGGTATTTCCCTT-3'

584 Cysteine to alanine change at codon 143-

585 5'-GCGATTGTGTTTCCATCGGCGCTTACGCAATGACCAATCAGGG-3' and

586 5'- CCCTGATTGGTCATTGCGTAAGCGCCGATGGAAACACAATCGC-3'

587 In the third step, both the PCR products were mixed in 1:1 molar ratio and end filling was  
588 done by PCR in 10 cycles at low annealing temperature. After addition of common forward  
589 and reverse primer, PCR was resumed for the next 30 cycles. The final PCR product was  
590 digested with XbaI-HindIII and cloned into pTrc99a digested with the same enzymes. The  
591 recombinant plasmids, pRB2 (*ldtF*-H135A) and pRB3 (*ldtF*-C143A) were confirmed for the  
592 presence of mutations by sequencing.

593 **pRB4.** A fragment encoding *LdtF*<sup>20-246</sup> was cloned into pET21b vector in between NdeI and  
594 XhoI sites using forward and reverse primers

595 5'-GGAATTCCATATGGGTTTGCTGGGCAGCAGTAG-3 and

596 5'-CCGCTCGAGTTTTGCCTCGGGGAGCGTG TAG-3' respectively to generate a C-  
597 terminal 6XHis fusion vector. The plasmid was confirmed by sequencing and used for  
598 expression and purification of *LdtF*.

599 **Construction of an *ldtF* deletion mutation ( $\Delta$ 149*ldtF*::Kan)**



600 We constructed a partial deletion mutant of *ldtF* lacking N-terminal 1-149 amino acids using  
601 recombineering as described earlier (35). The hybrid primers used for constructing this  
602 deletion are:

603 FP: 5'-

604 GTCCTGGCGTGTGTAACCGTTTTATCAAGGAATAAGCAGTATGTGTAGGCTGGAG  
605 CTGCTTC-3'

606 RP: 5'-

607 CACCAGCGCACCAGTAACGAACTGGAATATCTCATCAATACCATATGAATATCCT  
608 CCTTAG-3'

609 In the first step, the Kan<sup>R</sup> cassette of pKD4 vector (35) was amplified with above set of  
610 primers and the purified PCR product was electroporated into a strain encoding  $\lambda$  Red-Gam  
611 system. Transformants were selected on plates supplemented with 25  $\mu$ g/ml kanamycin,  
612 followed by confirming the deletion by sequencing and linkage analysis. The deletion was  
613 subsequently transferred by P1 transduction into MG1655. This deletion mutant behaved  
614 exactly like that of the deletion mutant of Keio collection (in terms of causing sickness to  
615 *mepS mepK* double mutant and in PG composition) and hence, Keio deletion mutation was  
616 used throughout the study.

### 617 **Construction of *ldtF*-FLAG fusion**

618 Epitope tagging of LdtF using a 3xFlag was done at the 3' end of the gene at its native  
619 chromosomal locus by recombineering as described earlier (36). The sequence of the hybrid  
620 primers used for construction of this fusion is given below:

621 FP: 5'-  
622 GCAGCCACAACCTGGCATCAAACCTACACGCTCCCCGAGGCAAAAGACTACAAAGA  
623 CCATGACGGTG-3' and,  
624 RP: 5'-  
625 CGGGCAATGAAACCTGGCAAAAGATTATGCCAGGCGAATGGCGCCATATGAATA  
626 TCCTCCTTAG-3'

627 The 3xFlag tag along with Kan<sup>R</sup> cassette was amplified from plasmid pSUB11 (36) using the  
628 above primers. The 5' end of (43 bases) forward primer has homology to the C-terminal of  
629 *ldtF* without stop a codon whereas the 3' end (22 bases) has homology to the region encoding  
630 Flag epitope of pSUB11. Similarly, the 5' end of reverse primer has a region homologous (42  
631 bases) to the downstream sequence of *ldtF* whereas the 3'end has a region (22 bases) which  
632 has homology to the sequence of pSUB11 plasmid at the 3' end. The PCR product was  
633 electroporated into DY378 and transformants were selected on plates supplemented with 25  
634 µg/ml Kanamycin at 30°C on LB. The putative *ldtF*-3xFlag-Kan<sup>R</sup> region was transferred into  
635 MG1655 by P1 transduction and the construct was confirmed by sequencing and linkage  
636 analysis. The expression of the fusion tag was confirmed by western blotting using anti-  
637 FLAG antibodies.

### 638 **Confirmation of deletion mutation (mutant from Keio collection) of *ldtF***

639 The Keio deletion mutant of *ldtF* was confirmed by sequencing the gene-Kan<sup>R</sup> junctions. The  
640 region encompassing the deletion mutation was amplified using the below primers and  
641 sequenced using the same primers.

642 FP: 5'- GACAGGCTTGCGTAAACTC-3 and,  
643 RP: 5'- CAGGATGTGGAAATCGACTTCAGC-3

644 **Methods:**

645 **Purification of LdtF**

646 LdtF encoding plasmid, pET21b-*ldtF*<sup>20-246</sup> (pRB4) was transformed into BL21 ( $\lambda$ DE3) strain  
647 and transformants were selected on LB plates supplemented with ampicillin (Amp). One  
648 purified colony was grown overnight and used to dilute 1:100 into 50 ml fresh LB broth  
649 containing Amp. Culture was induced with 250  $\mu$ M IPTG at 0.6 OD and further allowed to  
650 grow for 2 h at 37°C. Cells were harvested, and pellet was stored at -30°C. When required,  
651 pellet was resuspended in 1 ml of buffer (50 mM Tris-Cl, 300 mM NaCl and 20 mM  
652 imidazole, pH 8.0) and lysed by sonication. Cell debris was removed by centrifugation and  
653 the supernatant was mixed with 200  $\mu$ l Ni<sup>2+</sup>-NTA agarose (Qiagen) and mixed for 1 h at 4°C.  
654 This mixture was loaded onto pre-washed empty column (Bio-Rad) and washed with 30 ml  
655 wash buffer-1 (50 mM Tris, 300 NaCl, 30 mM imidazole, pH 8.0) and 20 ml of wash buffer-  
656 2 (50 mM Tris, 300 NaCl, 50 mM imidazole, pH 8.0). The bound proteins were eluted with 5  
657 ml of elution buffer (50 mM Tris, 300 NaCl, 150 mM imidazole, pH 8.0) and concentrated to  
658 2.5 ml using a 3 kDa cut-off centrifugal membrane filter (Millipore). This was then loaded  
659 onto a buffer exchange PD-10 column and protein was eluted into 3.5 ml 2 x storage buffer  
660 (100 mM Tris, 200 mM NaCl, 2 mM DTT). The fraction was further concentrated to 250  $\mu$ l  
661 using 3 kDa cut-off centrifugal membrane filter and mixed with equal volume of 100%  
662 glycerol and stored at -30°C.

663 **Viability assays and Microscopy.** Viability of the indicated strains was examined by  
664 growing cultures overnight, serially diluting ( $10^{-2}$ ,  $10^{-4}$ ,  $10^{-5}$  and  $10^{-6}$ ), and placing 3-5  $\mu$ l  
665 aliquots of each dilution onto the required plates. Plates were normally incubated for 18-24 h  
666 at the indicated temperature. To measure growth rates, overnight grown cultures were diluted  
667 1:100 into fresh medium, allowed to grow and OD at 600 nm was determined after every 1 h

668 interval and data were plotted using Origin software. For microscopy, immobilized cultures  
669 on a thin 1% agarose pad were visualized using Zeiss AxioImager.Z2 microscope by DIC.

670 **Preparation of PG sacculi.** Isolation of PG was done as described earlier (2,24). Cells  
671 grown to  $A_{600}$  of 1.0 were collected by centrifugation at  $10,000\times g$  for 10 min at  $4^{\circ}\text{C}$ . Cell  
672 pellet (from 1000 ml) was resuspended in 6 ml of ice-cold deionized water and added drop  
673 wise into 6 ml of boiling 8% SDS with vigorous stirring followed by boiling for another 45  
674 min to solubilize membranes and to destroy high molecular weight DNA. After overnight  
675 incubation at room temperature, the PG sacculi were collected by high speed centrifugation  
676 ( $200,000\times g$ , 40 min) and washed thoroughly with deionized water to completely remove  
677 SDS. High molecular weight glycogen and covalently bound lipoprotein, Lpp were removed  
678 by treating with  $\alpha$ -amylase (100  $\mu\text{g}/\text{ml}$  in 10 mM Tris-HCl, pH 7.0, 2 h at  $37^{\circ}\text{C}$ ) and pre-  
679 digested pronase (200  $\mu\text{g}/\text{ml}$ , 90 min at  $60^{\circ}\text{C}$ ). Enzymes were inactivated by boiling with  
680 equal volume of 8% SDS for 15 min and pure sacculi were obtained by ultracentrifugation  
681 and washed several times with water till SDS was completely removed. Final pellet was  
682 resuspended in 0.5 ml of 25 mM Tris-HCl (pH 8.0) and stored at  $-30^{\circ}\text{C}$ .

683 Lpp-bound PG sacculi were prepared from cultures grown up to  $A_{600}$  of  $\sim 6.0$  using the above-  
684 described protocol except that the treatment with Pronase was not done.

685 **Analysis of PG sacculi.** PG analysis was done as previously described (2,24). Essentially,  
686 the sacculi were digested with 10 U mutanolysin (Sigma-Aldrich) at  $37^{\circ}\text{C}$  in 25 mM Tris-  
687 HCl (pH 8.0) for 16 h and soluble muropeptides were collected after centrifugation. This  
688 fraction was reduced with 1 mg of sodium borohydride in 50 mM sodium borate buffer (pH  
689 9.0) for 30 min and excess borohydride was destroyed by addition of 20% phosphoric acid.  
690 pH was adjusted to 3–4 and samples were loaded onto a reverse phase C18 column (Zorbax  
691 300 SB;  $250\times 4.6$  mm, 5 mm) connected to Agilent technologies RRLC 1200 system. Column

692 temperature was 55°C and binding was done at a flow rate of 0.5 ml/min with 1% acetonitrile  
693 in water containing 0.1% trifluoroacetic acid (TFA) for 10 min. Muropeptides were eluted in  
694 a gradient of 1–10% acetonitrile containing 0.1% TFA at a flow rate of 0.5 ml/min for next  
695 60 min (using RRLC online software called Chemstation). Absorbance of muropeptides was  
696 detected at 205 nm.

697 **Mass spectrometry (MS) analysis of muropeptides.** Muropeptide fractions collected during  
698 HPLC were dried and reconstituted into 5% acetonitrile with 0.1% formic acid and loaded  
699 onto a reverse phase PepMap<sup>TM</sup> RSLC - C18 column (3 µm, 100Å, 75µmx, 15cm) connected  
700 to Q-Exactive<sup>TM</sup> HF Hybrid Quadrupole-Orbitrap<sup>TM</sup> Mass Spectrometer (Thermo Fisher  
701 Scientific, USA). Peaks were analysed by tandem MS and structures were decoded based on  
702 molecular mass of the individual fragments.

#### 703 **Determination of Lpp-bound muropeptides**

704 Normalized muropeptides were boiled with laemmli loading dye and separated using 15%  
705 SDS-PAGE. Lpp was detected by western blot using rabbit anti-Lpp antibody (rabbit). As a  
706 positive control (free form of Lpp) cell lysates of WT,  $\Delta ldtF$ , or  $\Delta ldtABC$  (equivalent of  
707 0.012 OD) were used.

#### 708 **Cleavage of Lpp from intact PG sacculi**

709 Lpp-bound PG sacculi were isolated from WT and  $\Delta ldtF$  (grown upto ~6 OD) without  
710 pronase treatment as described. Equal volumes of the PG sacculi were treated with buffer,  
711 pronase (as positive control) or LdtF (4 µM) for 16 h at 30°C. Reaction was stopped by heat  
712 inactivation and supernatant was collected after centrifugation at 15000xg for 15 min. These  
713 fractions were run on 15% SDS-PAGE to detect the Lpp released from intact PG sacculi. The

714 remaining pellet fraction was further digested with mutanolysin and the resulting soluble

715uropeptides were separated by RP-HPLC.

716

717 **Supplementary Figures:**

718

Fig. S1

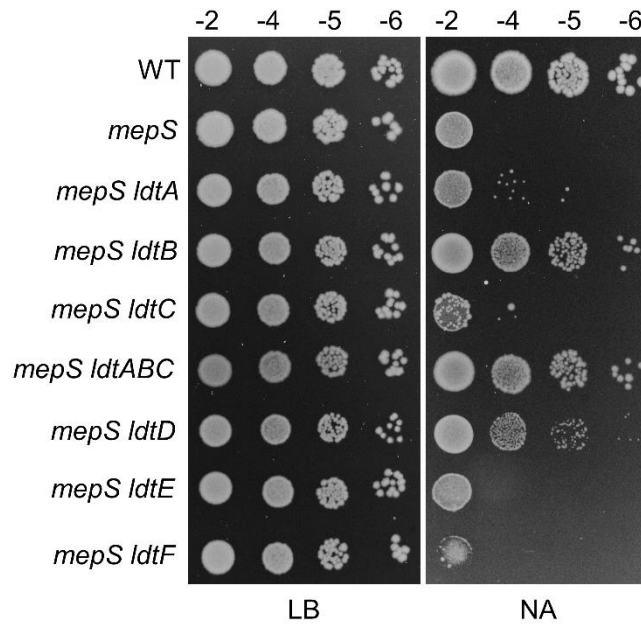

719

720 **Fig. S1.** Genetic interactions of *mepS* with *ldts*. WT (MG1655) and its deletion mutant  
721 derivatives were grown overnight in LB broth, serially diluted, and 5 µL of each dilution  
722 were spotted on indicated plates and tested for viability at 37°C.

Fig. S2

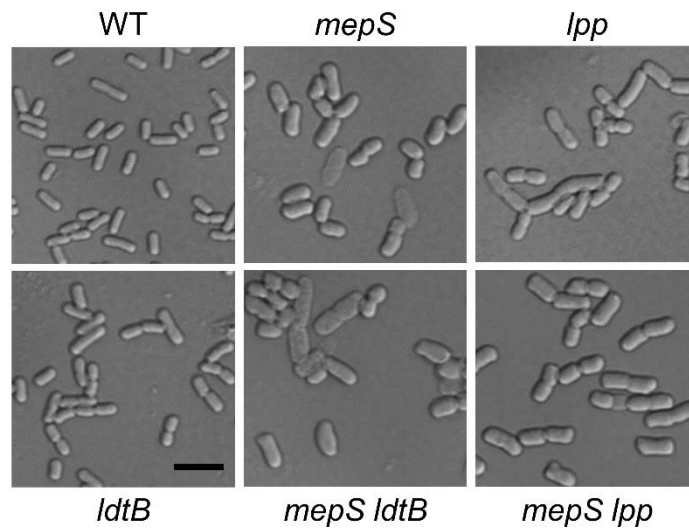

723

724 **Fig. S2.** Microscopic images of WT and its various mutant derivatives. Indicated strains

725 were grown overnight and diluted 1:500 into prewarmed Nutrient Broth and grown till  $A_{600}$  of

726 1.0 at 37°C and visualized with DIC microscopy. The scale bar represents 5  $\mu\text{m}$ .



Fig. S3

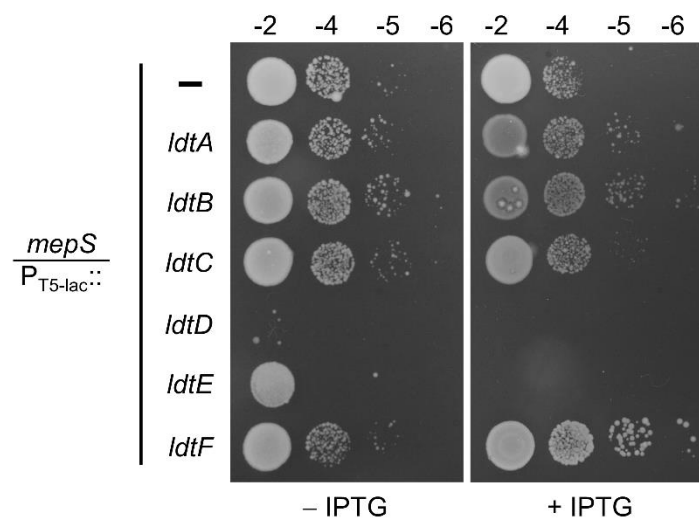

727

728 **Fig. S3.** Effect of multiple copies of Ldts on growth of *mepS* mutant.  $\Delta mepS$  mutant carrying

729 either pCA24N vector (P<sub>T5-lac</sub>::) or its derivatives (P<sub>T5-lac</sub>::*ldtA-F*) were grown and viability

730 was tested on NA plates at 37°C with or without 50  $\mu$ M IPTG.

Fig. S4

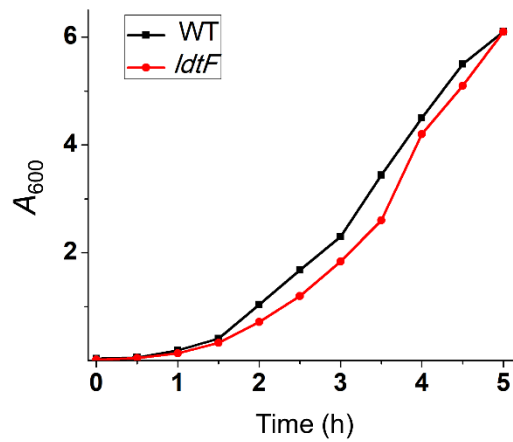

731  
732 **Fig. S4.** Growth curve of *ldtF* mutant. Overnight grown cultures of WT and *ldtF* were sub-  
733 cultured 1:500 into fresh LB and growth was monitored every 30 min at 37°C. In addition,  
734 *ldtF* mutant shows comparable decrease in the doubling time compared to that of WT when  
735 grown in any media including LBON or Minimal A media with or without glycine-  
736 supplementation.

Fig. S5

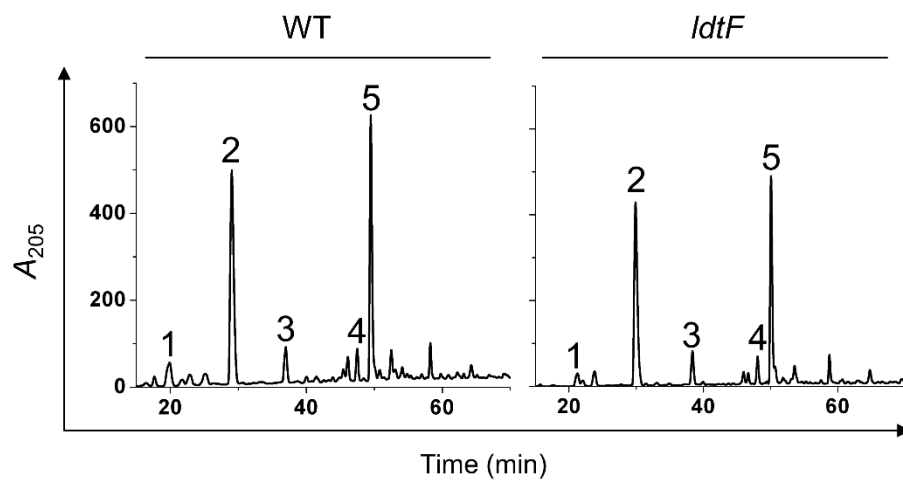

737

738 **Fig. S5.** PG composition of *ldtF* mutant. HPLC chromatograms of PG sacculi isolated from  
739 WT and *ldtF* mutant. Strains were grown to an  $A_{600}$  of  $\sim 1$  in LB followed by isolation and  
740 analysis of PG sacculi. Data shown is representative of three independent experiments.

Fig. S6

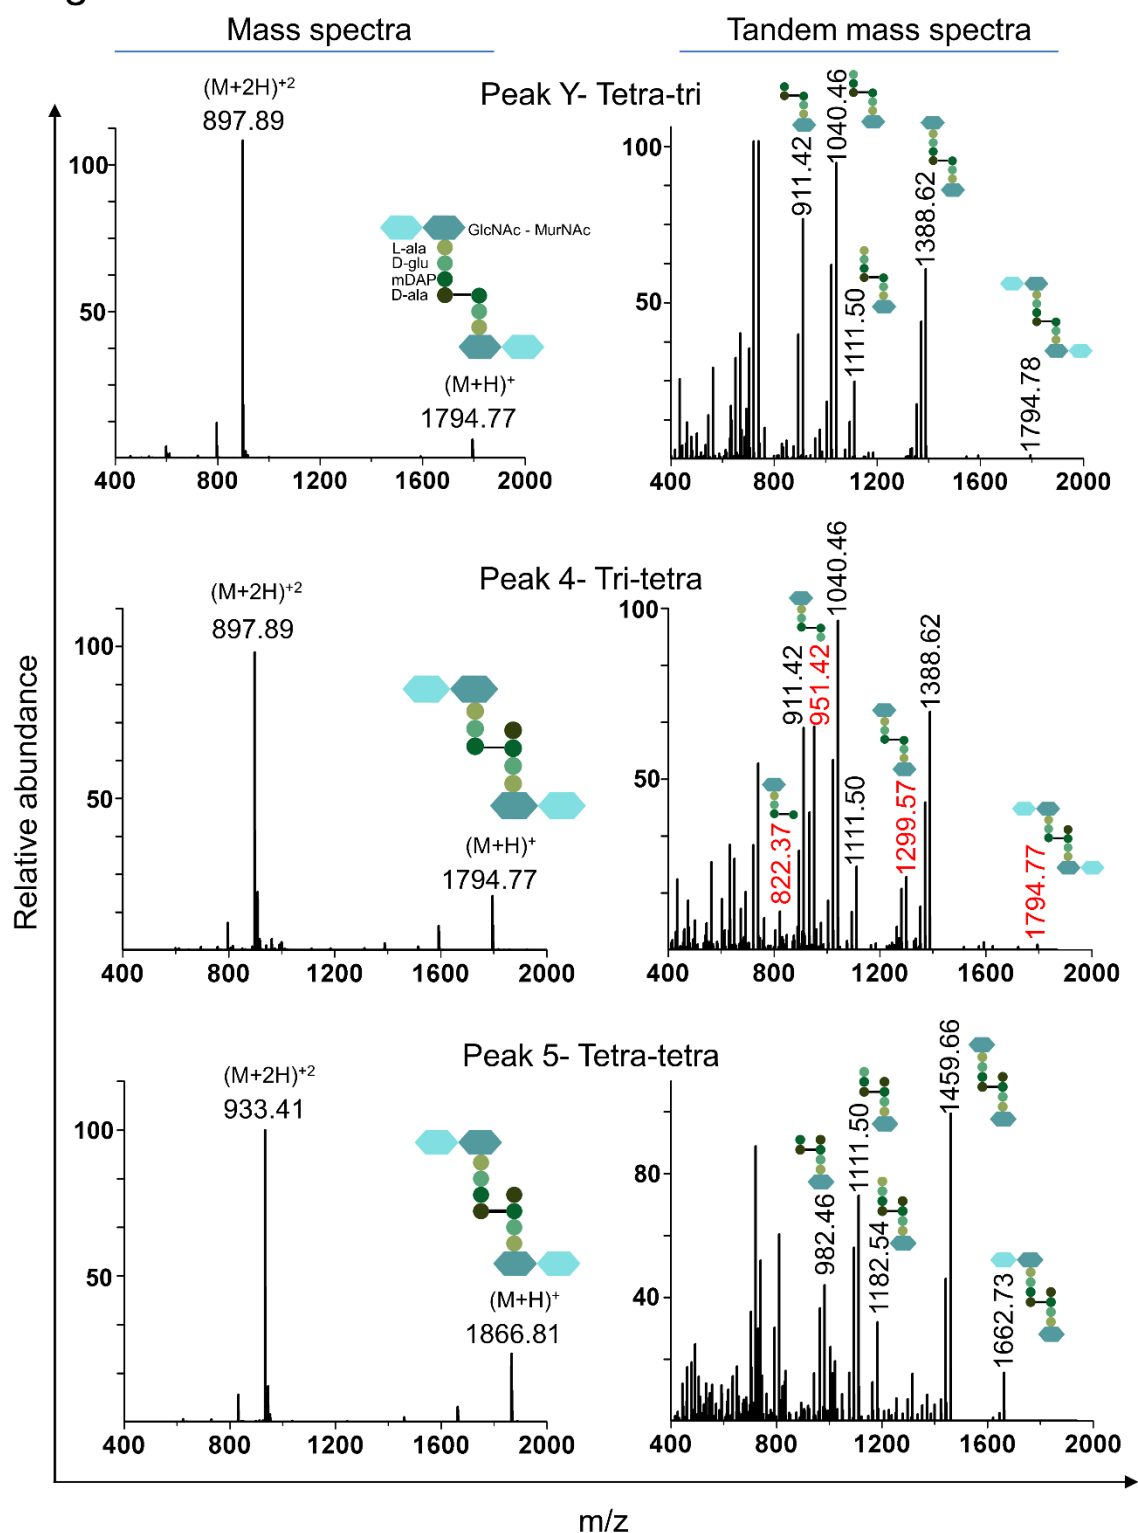

741  
 742 **Fig. S6.** Mass spectrometry analysis of various mucopeptides including tetra-tri, tri-tetra and  
 743 tetra-tetra. Mass spectra of various mucopeptides indicating the molecular mass (both +1 and

744 +2 charges) is shown. The signature peaks indicating the 3–3 cross-links in tri-tetra are

745 highlighted in red.

746

Fig. S7

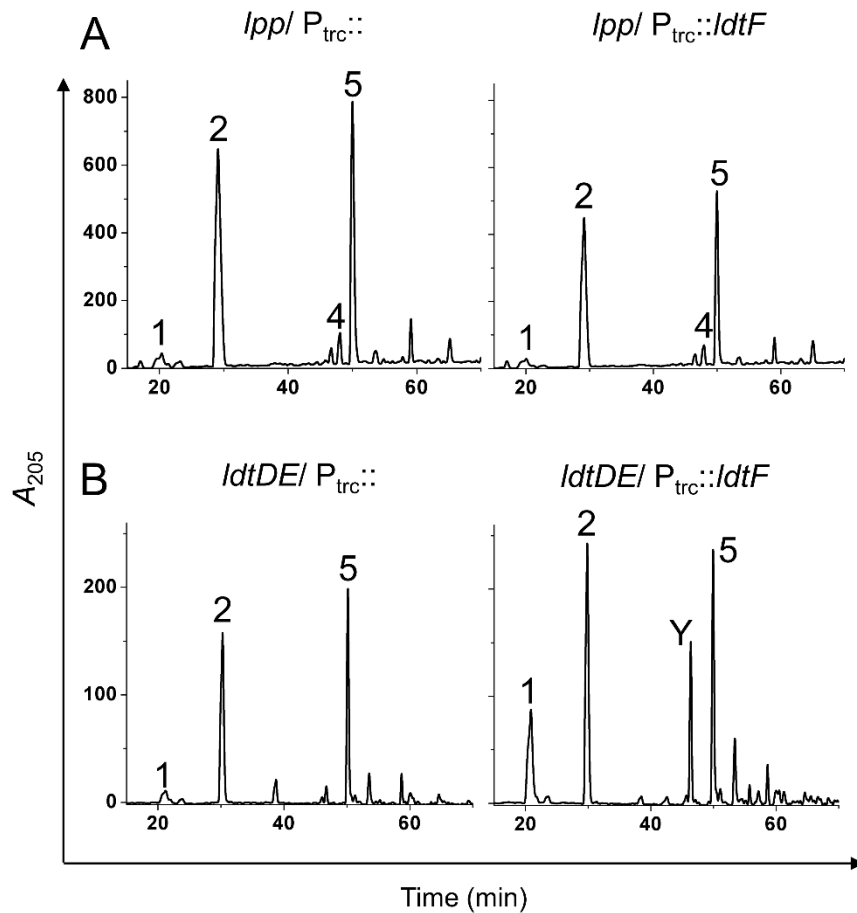

747

748 **Fig. S7.** PG composition of strains with ectopic expression of LdtF. HPLC chromatograms of

749 PG sacculi isolated from (A) *lpp* or (B) *ldtDE* deletion mutants carrying either vector

750 (pTrc99a; P<sub>trc</sub>::) or pRB1(P<sub>trc</sub>::*ldtF*). Strains were grown to an  $A_{600}$  of ~1 in LB containing

751 150  $\mu$ M IPTG followed by isolation and analysis of PG sacculi. Note that in absence of Lpp,

752 increased LdtF does not alter the PG composition. On the other hand, the effect of LdtF is

753 independent of LdtD and -E.

Fig. S8

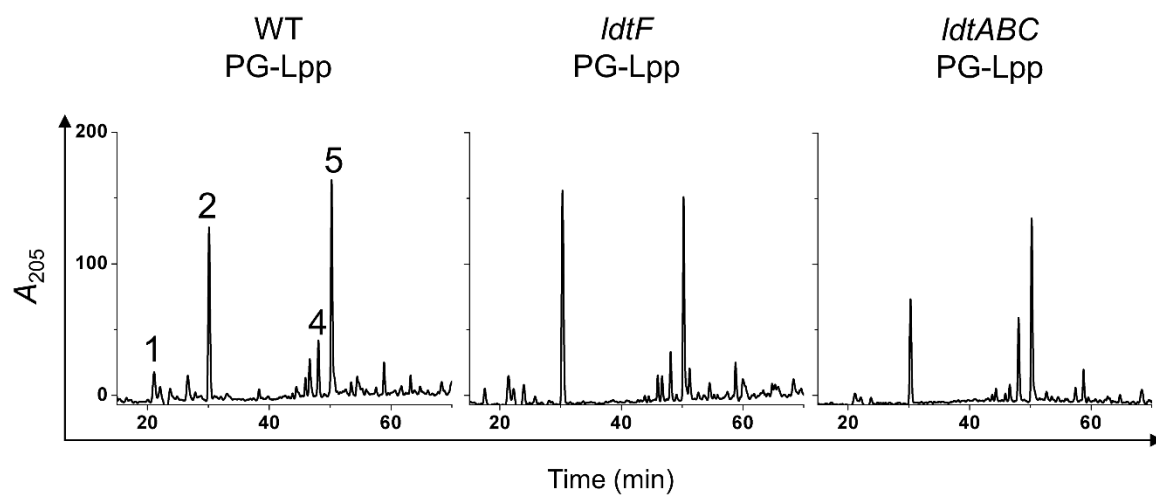

754

755 **Fig. S8.** HPLC chromatograms of Lpp-bound PG sacculi from WT, *ldtF* and *ldtABC* mutant.

756 The data obtained from these chromatograms was used to normalize the amount of sample

757 loaded for performing the experiment described in Fig. 3D.

Fig. S9

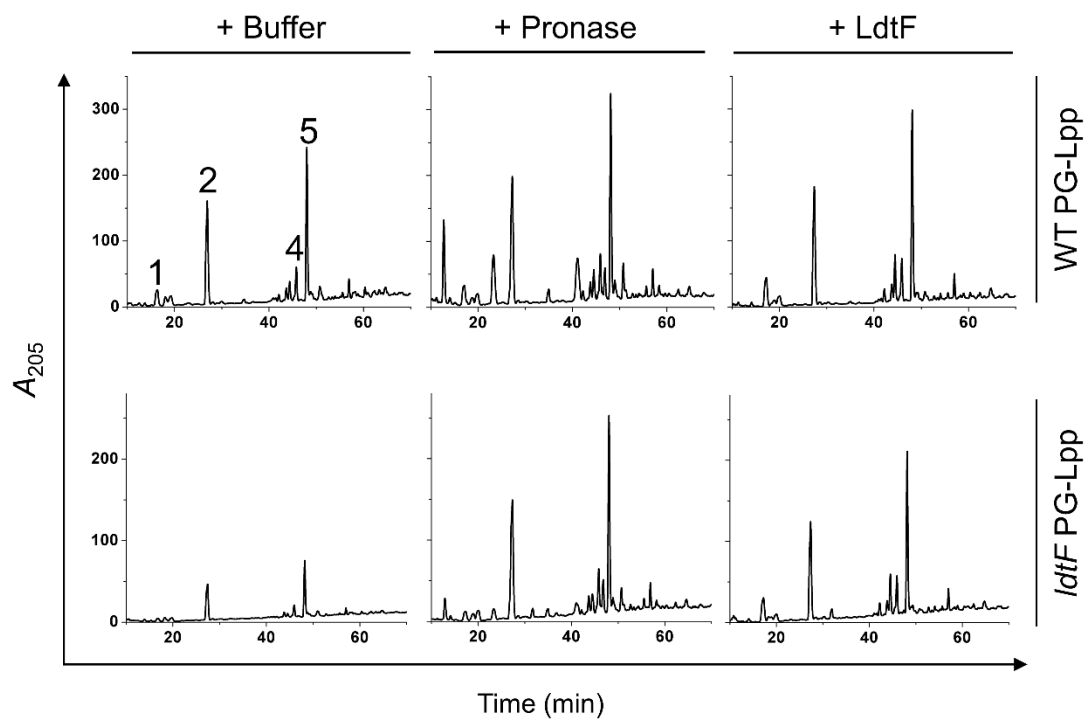

758

759 **Fig. S9.** HPLC chromatograms of Lpp-bound PG sacculi from WT and *ldtF* mutant. The PG

760 sacculi were treated either with buffer, pronase (0.2 mg/ml) or LdtF (4  $\mu$ M) for 16 h at 30°C

761 and the remaining insoluble fraction was treated with mutanolysin and separated by HPLC.

762 Note that the tri-lys-arg peak is absent in LdtF-treated PG sacculi.



Fig. S10

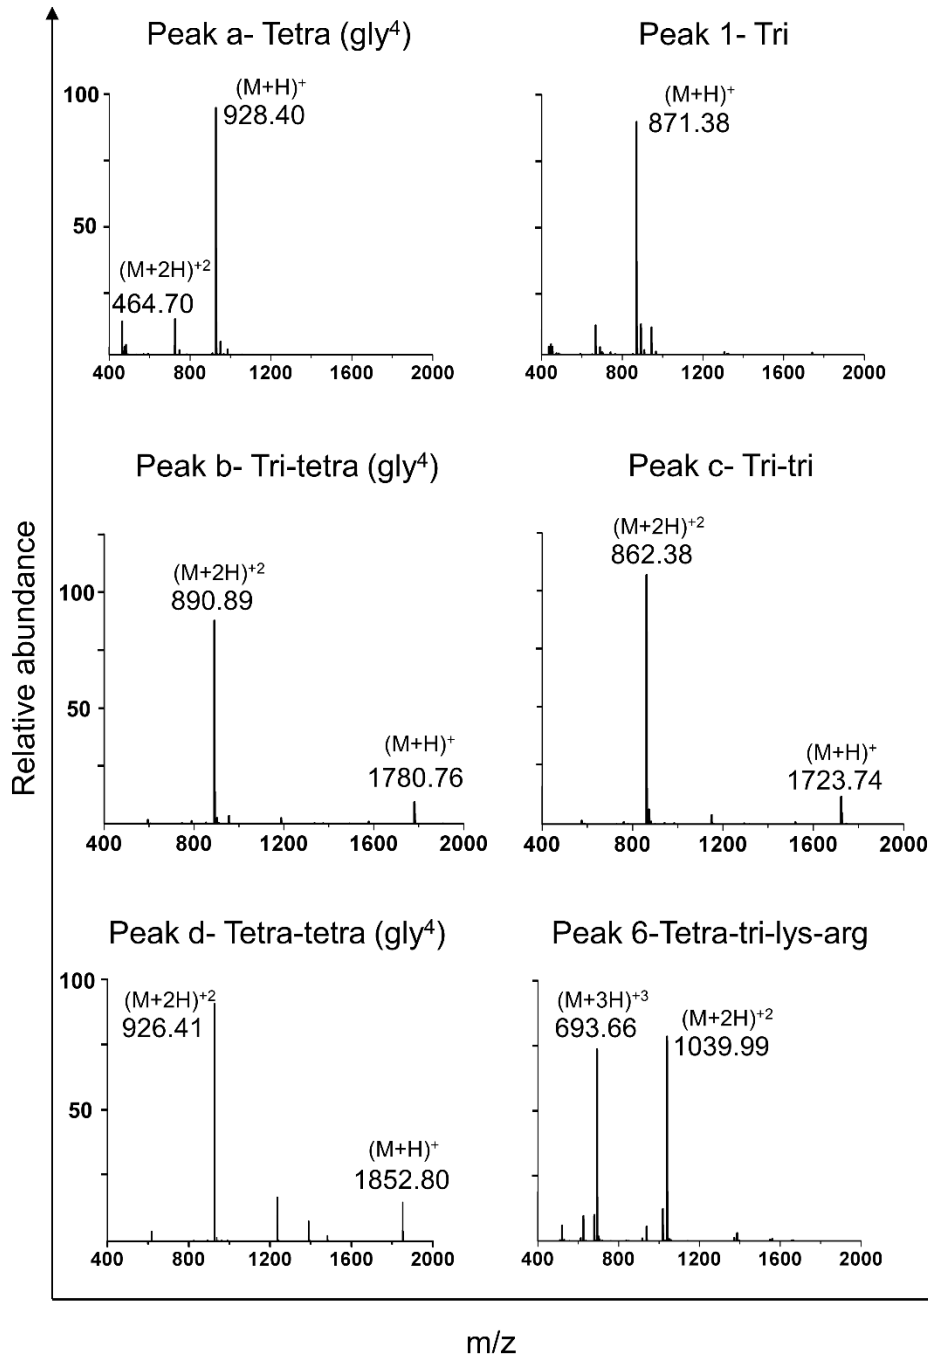

763

764

**Fig. S10.** Identification of mucopeptides using Mass spectrometry analysis. Mass spectra of

765

various mucopeptides indicating the molecular mass (both +1 and +2 charges) is shown.

Fig. S11

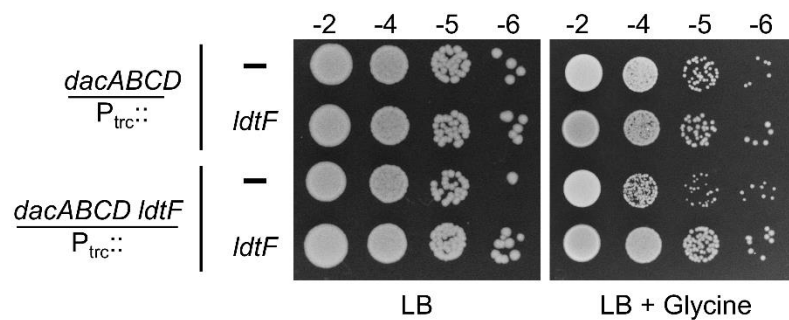

766

767 **Fig. S11.** Effect of LdtF on glycine-toxicity of *dacABCD* mutant. Cultures of *dacABCD* and

768 *dacABCD ldtF* mutants carrying either vector (pTrc99a; P<sub>trc</sub>::) or pRB1(P<sub>trc</sub>::*ldtF*) were

769 grown in LB broth, serially diluted, and 5  $\mu$ L of each dilution were spotted on indicated

770 plates and tested for viability at 37°C. Glycine and IPTG are used at 25 mM and 100  $\mu$ M

771 respectively. *dacABCD* deletion mutant was slow-growing on glycine-supplementation and

772 *ldtF* deletion exacerbated the sickness whereas more copies of *ldtF* marginally improved the

773 growth of the quadruple mutant.

Fig. S12 A

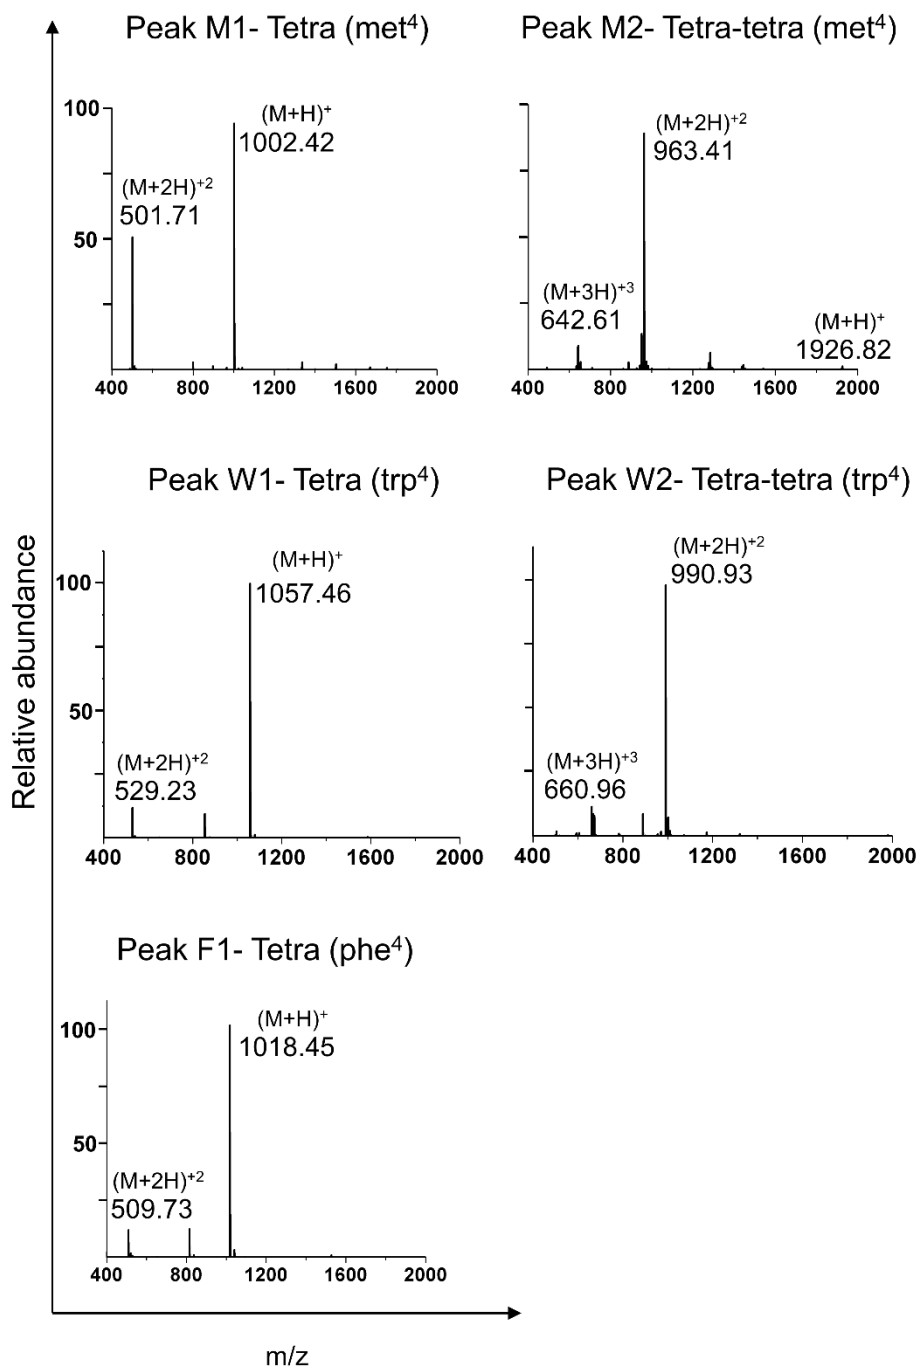

774  
775

Fig. S12 B

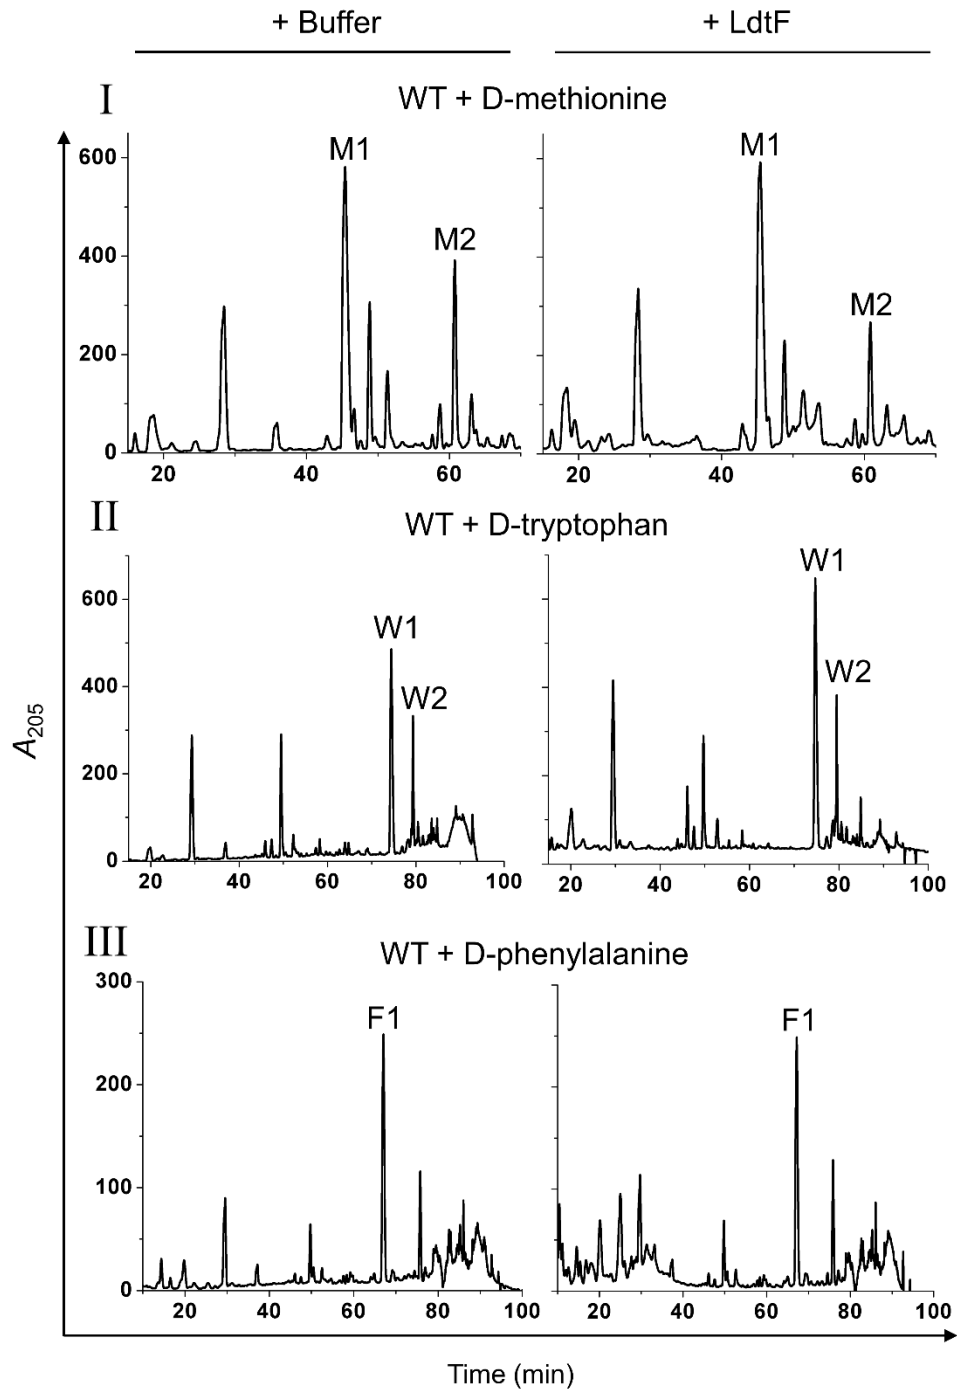

776

777 **Fig. S12.** Effect of LdtF on NCDAA containing mucopeptides. (A) Mass spectrometry

778 analysis of mucopeptides containing NCDAA (D-methionine, D-tryptophan or D-

779 phenylalanine) (B) Treatment of soluble mucopeptides from PG sacculi of strains grown in 20

780 mM D-methionine (I), 15 mM D-tryptophan (II), or 15 mM D-phenylalanine (III) were

- 781 incubated either with buffer or LdtF (4  $\mu$ M) for 16 h and separated by RP-HPLC. LdtF did
- 782 not cleave the terminal D-amino acids from any of the NCDAA-muropeptides.

783 **Table S1. Strains used in this study**

| Strains     | Genotype <sup>a</sup>                                                                                     | Source/Reference |
|-------------|-----------------------------------------------------------------------------------------------------------|------------------|
| WT (MG1655) | <i>rph1 ilvG rfb-50</i>                                                                                   | Lab collection   |
| DH5α        | F <sup>-</sup> <i>hsdR17 deoR recA1 endA1phoA supE44 thi-1 gyrA96 relA1 Δ(lac-argF)U169 φ80dlacZ ΔM15</i> | Lab collection   |
| BL21 (λDE3) | <i>ompT rB mB</i> (P <sub>lac</sub> UV5::T7gene1)                                                         | Lab collection   |
| DY378       | Recombineering strain; W3110 <i>λcI857 Δ(cro-bioA)</i>                                                    | Lab collection   |
|             | <i>ΔmepS::frt</i>                                                                                         | 23               |
| RB11        | <i>ΔldtF::Kan</i> (Keio)                                                                                  | 34               |
| RB12        | <i>Δ149ldtF::Kan</i>                                                                                      | This study       |
| RB13        | <i>Δlpp::Kan</i>                                                                                          | This study       |
| RB14        | <i><sup>b</sup>lpp<sup>ΔK58</sup></i>                                                                     | This study       |
| RB15        | <i>ΔldtABC::frt</i>                                                                                       | This study       |
| RB15        | <i>ΔldtDE::frt</i>                                                                                        | This study       |
|             | <i>ΔyciB ΔdcrB</i>                                                                                        | 31               |
| RB16        | <i>ΔdacABCD::frt</i>                                                                                      | This study       |

784

785 <sup>a</sup>Deletion alleles used in this study are sourced from Keio collection (34). The deletion  
786 mutations were used after testing for their authenticity (by linkage analysis, PCR and  
787 sequence analysis) and introduced into different strain backgrounds by P1 phage-mediated  
788 transduction (33). MG1655 was used as the wild type strain. The Kan marker from strains  
789 was flipped out using pCP20 plasmid encoding a Flp recombinase (35). Flipping creates a  
790 ‘*frt*’ scar at the site of deletion.

791 <sup>b</sup>*lpp<sup>K58</sup>* allele is from Thomas Silhavy’s laboratory. It was transferred by P1 transduction  
792 using a 60% linked tetracycline marker.

793

794 **Table S2. Plasmids used in this study**

| Plasmid             | Relevant features                                                              | Source/Reference |
|---------------------|--------------------------------------------------------------------------------|------------------|
| pET21b              | ColE1, Amp <sup>R</sup> , <i>lacIq</i> , T7 <i>lac</i>                         | Lab collection   |
| pTrc99a             | ColE1, Amp <sup>R</sup> , <i>lacIq</i> , P <sub>trc</sub>                      | Lab collection   |
| pCA24N              | Cm <sup>R</sup> , <i>lacI<sup>q</sup></i> , P <sub>T5-lac</sub>                | 26               |
| pCA24N- <i>ldtA</i> | Cm <sup>R</sup> , <i>lacI<sup>q</sup></i> , P <sub>T5-lac</sub> :: <i>ldtA</i> | 26               |
| pCA24N- <i>ldtB</i> | Cm <sup>R</sup> , <i>lacI<sup>q</sup></i> , P <sub>T5-lac</sub> :: <i>ldtB</i> | 26               |
| pCA24N- <i>ldtC</i> | Cm <sup>R</sup> , <i>lacI<sup>q</sup></i> , P <sub>T5-lac</sub> :: <i>ldtC</i> | 26               |
| pCA24N- <i>ldtD</i> | Cm <sup>R</sup> , <i>lacI<sup>q</sup></i> , P <sub>T5-lac</sub> :: <i>ldtD</i> | 26               |
| pCA24N- <i>ldtE</i> | Cm <sup>R</sup> , <i>lacI<sup>q</sup></i> , P <sub>T5-lac</sub> :: <i>ldtE</i> | 26               |
| pCA24N- <i>ldtF</i> | Cm <sup>R</sup> , <i>lacI<sup>q</sup></i> , P <sub>T5-lac</sub> :: <i>ldtF</i> | 26               |
| pRB1                | pTrc99a- <i>ldtF</i>                                                           | This study       |
| pRB2                | pTrc99a- <i>ldtF</i> -H135A                                                    | This study       |
| pRB3                | pTrc99a- <i>ldtF</i> -C143A                                                    | This study       |
| pRB4                | pET21b- <i>ldtF</i> <sup>20-246</sup>                                          | This study       |

795

796 **Table S3. Muropeptide composition of strains carrying multiple copies of *ldtF***

| Muropeptide<br>(Peak) | % Area of muropeptide peaks <sup>a</sup> |                                        |                                                         |                                                         |
|-----------------------|------------------------------------------|----------------------------------------|---------------------------------------------------------|---------------------------------------------------------|
|                       | WT/<br>P <sub>trc</sub> ::               | WT/<br>P <sub>trc</sub> :: <i>ldtF</i> | WT/<br>P <sub>trc</sub> :: <i>ldtF</i> <sub>H135A</sub> | WT/<br>P <sub>trc</sub> :: <i>ldtF</i> <sub>C143A</sub> |
| Tri (1)               | 5.81 ± 0.06                              | 15.74 ± 0.47                           | 9.51 ± 0.47                                             | 8.91 ± 1.41                                             |
| Tetra (2)             | 38.91 ± 0.37                             | 34.19 ± 1.70                           | 35.14 ± 1.42                                            | 37.6 ± 1.47                                             |
| Tri-lys-arg (3)       | <b>4.57 ± 0.53</b>                       | <b>0.7 ± 0.60</b>                      | <b>2.2 ± 1.22</b>                                       | <b>1.86 ± 1.06</b>                                      |
| Tetra-tri (Y)         | <b>3.0 ± 0.23</b>                        | <b>11.75 ± 2.67</b>                    | <b>5.34 ± 0.06</b>                                      | <b>5.27 ± 0.77</b>                                      |
| Tri-tetra (4)         | 3.54 ± 0.35                              | 2.47 ± 0.45                            | 3.99 ± 0.25                                             | 4.87 ± 0.18                                             |
| Tetra-tetra (5)       | 32.22 ± 0.70                             | 25.15 ± 1.79                           | 27.44 ± 2.6                                             | 26.33 ± 2.91                                            |

797

798 <sup>a</sup>Muropeptide analysis was done by calculating the relative percentage area of each

799 muropeptide from the HPLC chromatograms.

800

801

802

803

804

805
